# Supplementary material for: Eugenol modulates the NOD1-NF-κB signaling pathway via targeting NF-κB protein in triple-negative breast cancer cells
Source: Front Endocrinol (Lausanne). 2023 Feb 27;14:1136067. doi: 10.3389/fendo.2023.1136067 (PMC10009163; doi:10.3389/fendo.2023.1136067)
Supplement: Supplementary file 2 [file Table_1.xlsx]

## Sheet: Sheet3
Rank	Score	Type	ID	Name	Description
1	-99.4	cp	BRD-K54256913	MK-1775	WEE1 kinase inhibitor
4	-99.08	cp	BRD-K80527266	triacsin-c	Adrenergic receptor antagonist
5	-98.95	cp	BRD-K32536677	AGK-2	SIRT inhibitor
25	-98.89	cp	BRD-K01192156	tyrphostin-AG-112	Protein tyrosine kinase inhibitor
30	-98.8	cp	BRD-K86465814	HO-013	PPAR receptor agonist
40	-98.73	cp	BRD-K32977963	eugenol	Androgen receptor antagonist
41	-98.66	cp	BRD-K41260949	valproic-acid	HDAC inhibitor
49	-98.32	cp	BRD-K82746043	navitoclax	BCL inhibitor
50	-97.99	cp	BRD-K64451768	GANT-58	GLI antagonist
51	-97.92	cp	BRD-U88459701	atorvastatin	HMGCR inhibitor
52	-97.84	cp	BRD-K08703257	3-amino-benzamide	PARP inhibitor
53	-97.81	cp	BRD-A32161980	carbetocin	Oxytocin receptor agonist
60	-97.26	cp	BRD-A73680854	PT-630	Dipeptidyl peptidase inhibitor
61	-97.22	cp	BRD-K74236984	UNC-0321	Histone lysine methyltransferase inhibitor
62	-97.15	cp	BRD-K32107296	temozolomide	DNA alkylating agent
64	-96.32	cp	BRD-K14550461	doxercalciferol	Vitamin D receptor agonist
70	-96.26	cp	BRD-K36324071	NF-449	Purinergic receptor antagonist
72	-95.98	cp	BRD-K01638814	rilmenidine	Adrenergic receptor agonist
75	-95.81	cp	BRD-K93176058	AC-55649	Retinoid receptor agonist
76	-95.76	cp	BRD-K93095519	SJ-172550	MDM inhibitor
79	-95.71	cp	BRD-K06878038	deferiprone	Chelating agent
81	-95.71	cp	BRD-K85133207	HDAC1-selective	HDAC inhibitor
83	-95.34	cp	BRD-K79131256	albendazole	Anthelmintic
84	-94.8	cp	BRD-A68631409	evodiamine	ATPase inhibitor
85	-94.13	cp	BRD-K56450366	NSC-94258	Antineoplastic
86	-94.06	cp	BRD-K61314889	IWR-1-ENDO	PARP inhibitor
87	-94.03	cp	BRD-K17349619	HLI-373	MDM inhibitor
88	-94	cp	BRD-K19416115	sitagliptin	Dipeptidyl peptidase inhibitor
89	-93.07	cp	BRD-K04010869	prostaglandin-a1	HSP inducer
92	-92.53	cp	BRD-A09925278	etilefrine	Adrenergic receptor agonist
93	-92.42	cp	BRD-A67373739	AICA-ribonucleotide	AMPK activator
95	-92.11	cp	BRD-K93325701	damnacanthal	SRC inhibitor
96	-91.66	cp	BRD-A34255068	rolipram	Phosphodiesterase inhibitor
97	-90.95	cp	BRD-K20338176	cefaclor	Bacterial cell wall synthesis inhibitor
100	-90.7	cp	BRD-K33204703	AG-370	PDGFR receptor inhibitor
103	-90.3	cp	BRD-K64785675	TG100-115	-666
107	-88.98	cp	BRD-K32610195	androstenedione	Cytochrome P450 inhibitor
108	-88.54	cp	BRD-A62182663	YK-4279	Apoptosis stimulant
112	-88.41	cp	BRD-K48923948	BMS-641988	Androgen receptor antagonist
113	-88.3	cp	BRD-K83963101	MLN-8054	Aurora kinase inhibitor
114	-86.04	cp	BRD-K47693913	evoxine	Furoquinoline alkaloid
117	-85.85	cp	BRD-K16554956	PTB1	AMPK activator
118	-84.84	cp	BRD-A58955223	sulforaphane	Antineoplastic
119	-84.27	cp	BRD-A20131130	2',5'-dideoxyadenosine	Adenylyl cyclase inhibitor
120	-83.79	cp	BRD-K50720187	flupirtine	Glutamate receptor antagonist
124	-82.73	cp	BRD-K09859624	methantheline	Acetylcholine receptor antagonist
128	-82.23	cp	BRD-K14329163	BAY-K8644	Calcium channel activator
129	-82.01	cp	BRD-K32311154	nifekalant	Potassium channel blocker
134	-81.64	cp	BRD-A48261811	argatroban	Thrombin inhibitor
137	-81.12	cp	BRD-K05926469	lenalidomide	Antineoplastic
138	-80.8	cp	BRD-A22380646	pantoprazole	ATPase inhibitor
139	-80.76	cp	BRD-K43880410	pregnenolone	glutamate receptor modulator
146	-80.43	cp	BRD-K24994810	androstenol	GABA receptor modulator
152	-80.16	cp	BRD-K76872913	benzanthrone	Aromatic hydrocarbon derivative
153	-80.07	cp	BRD-K01779529	fluoropyruvate	Pyruvate dehydrogenase kinase inhibitor
154	-79.85	cp	BRD-A04352665	maraviroc	CC chemokine receptor antagonist
155	-79.85	cp	BRD-K40892394	AR-C133057XX	Nitric oxide synthase inhibitor
156	-79.79	cp	BRD-K49456190	prima-1-met	thioredoxin inhibitor
158	-79.72	cp	BRD-K70511574	sunitinib	PLK inhibitor
162	-79.48	cp	BRD-K51318897	fenbendazole	Tubulin inhibitor
163	-79.3	cp	BRD-K70883034	nimetazepam	GABA receptor agonist
166	-78.96	cp	BRD-K99696746	fatostatin	SREBP inhibitor
167	-78.96	cp	BRD-K81376179	TCS-359	FLT3 inhibitor
169	-78.28	cp	BRD-K33483813	actarit	Interleukin receptor agonist
170	-78.12	cp	BRD-K44084986	Y-27632	Rho associated kinase inhibitor
172	-77.71	cp	BRD-K92492521	LY-255283	Leukotriene receptor antagonist
173	-77.35	cp	BRD-K53665955	MK-5108	Aurora kinase inhibitor
176	-77.14	cp	BRD-A01145011	zebularine	DNA methyltransferase inhibitor
179	-77.04	cp	BRD-K12762134	XAV-939	Tankyrase inhibitor
181	-76.73	cp	BRD-K37130656	rivaroxaban	Coagulation inhibitor
183	-76	cp	BRD-K14643723	4-(2-Amino-ethyl)-benzenesulfonamide	carbonic anhydrase inhibitor
184	-75.66	cp	BRD-K35687265	ON-01910	PLK inhibitor
185	-73.63	cp	BRD-U94846492	quinine	Hemozoin biocrystallization inhibitor
186	-73.01	cp	BRD-K23875128	RHO-kinase-inhibitor-III[rockout]	Rho associated kinase inhibitor
190	-72.79	cp	BRD-U44618005	WH-4023	SRC inhibitor
191	-72.71	cp	BRD-K30990140	FR-122047	Cyclooxygenase inhibitor
193	-72.06	cp	BRD-K55420858	mirin	MRE11A exonuclease inhibitor
201	-71.89	cp	BRD-A32836748	leu-enkephalin	Opioid receptor agonist
210	-71.49	cp	BRD-K47328134	lysylphenylalanyl-tyrosine	Heparin activation inhibitor
212	-71.26	cp	BRD-K46862739	metyrapone	Cytochrome P450 inhibitor
215	-71.03	cp	BRD-K46212057	voriconazole	Cytochrome P450 inhibitor
222	-70.79	cp	BRD-K15891719	tenofovir	Reverse transcriptase inhibitor
223	-70.24	cp	BRD-A54029483	IRL-2500	Endothelin receptor antagonist
224	-70.03	cp	BRD-K02407574	parbendazole	Tubulin inhibitor
229	-70.01	cp	BRD-A62035778	scopolamine	Acetylcholine receptor antagonist
230	-69.49	cp	BRD-K20313525	rosmarinic-acid	GABA transaminase inhibitor
231	-69.48	cp	BRD-A61793559	metolazone	Carbonic anhydrase inhibitor
232	-69.28	cp	BRD-K97330509	SRC-kinase-inhibitor-II	SRC inhibitor
236	-68.79	cp	BRD-K77793136	hydroxyfasudil	Rho associated kinase inhibitor
237	-68.53	cp	BRD-K20986251	lithocholic-acid	FXR antagonist
238	-68.53	cp	BRD-A55393291	testosterone	Androgen receptor agonist
240	-68.37	cp	BRD-K72034655	peucedanin	Apoptosis stimulant
241	-68	cp	BRD-K81062487	taurocholic-acid	Bile acid
242	-67.73	cp	BRD-K08924299	palonosetron	Serotonin receptor antagonist
245	-67.5	cp	BRD-K40227168	vinburnine	Adrenergic receptor antagonist
247	-67.45	cp	BRD-A80574334	oxalomalic-acid	Isocitrate dehydrogenase inhibitor
248	-67.4	cp	BRD-K06080977	eicosatetraynoic-acid	Cyclooxygenase inhibitor
249	-67.38	cp	BRD-K19525698	ozagrel	Thromboxane synthase inhibitor
250	-67.37	cp	BRD-K08115555	tyrphostin-AG-1288	TNF production inhibitor
251	-66.93	cp	BRD-A80383043	BRD-A80383043	Glutamate receptor agonist
252	-66.87	cp	BRD-K97509413	coumestrol	Estrogen receptor agonist
253	-66.48	cp	BRD-K63915849	AS-604850	PI3K inhibitor
256	-66.13	cp	BRD-K10670311	sulfasalazine	Antirheumatic
257	-66.13	cp	BRD-K75532464	FTI-276	Farnesyltransferase inhibitor
259	-66.05	cp	BRD-K95609758	BMS-191011	Potassium channel activator
260	-65.85	cp	BRD-K22009844	phenprobamate	Muscle relaxant
263	-65.67	cp	BRD-K73589491	nizatidine	Histamine receptor antagonist
265	-65.56	cp	BRD-K57926513	tyrphostin-AG-1295	PDGFR receptor inhibitor
266	-65.08	cp	BRD-K78838262	austricine	Hypolipidemic
271	-64.58	cp	BRD-K32828673	chelidonine	Tubulin inhibitor
273	-64.54	cp	BRD-K07996107	harpagoside	Acetylcholinesterase inhibitor
276	-64.28	cp	BRD-K67174588	toremifene	Estrogen receptor antagonist
278	-64.26	cp	BRD-A74771556	nikkomycin	Chitin inhibitor
281	-64.21	cp	BRD-K51751936	alfadolone	GABA receptor agonist
283	-64.09	cp	BRD-K61097567	SB-218795	Tachykinin antagonist
285	-63.95	cp	BRD-K95309561	dienestrol	Estrogen receptor agonist
293	-63.62	cp	BRD-K61737877	VEGF-receptor-2-kinase-inhibitor-IV	VEGFR inhibitor
295	-62.51	cp	BRD-K09907482	PRL-3-inhibitor-I	Tyrosine phosphatase inhibitor
296	-62.49	cp	BRD-K47943470	tyrphostin-51	EGFR inhibitor
297	-61.89	cp	BRD-A92537424	danazol	Estrogen receptor antagonist
300	-61.66	cp	BRD-K10098805	rhapontin	Apoptosis stimulant
301	-61.42	cp	BRD-K62810658	PD-98059	MEK inhibitor
304	-60.55	cp	BRD-K74112339	acetohydroxamic-acid	Urease inhibitor
309	-60.35	cp	BRD-A36267905	buphenine	Adrenergic receptor agonist
310	-60.15	cp	BRD-A72703248	SKF-96365	Calcium channel blocker
311	-59.79	cp	BRD-K72816382	cinalukast	Leukotriene receptor antagonist
316	-59.78	cp	BRD-K84085265	CG-930	JNK inhibitor
318	-59.62	cp	BRD-A25775766	securinine	GABA receptor antagonist
327	-59.02	cp	BRD-A51393488	noscapine	Bradykinin receptor antagonist
329	-58.2	cp	BRD-K13571841	pepstatin	Aspartic protease inhibitor
334	-58.03	cp	BRD-K92758126	gibberellic-acid	NFkB pathway inhibitor
336	-57.81	cp	BRD-A76279427	myriocin	Serine palmitoyltransferase inhibitor
337	-57.56	cp	BRD-K20152659	gamma-homolinolenic-acid	Cholesterol inhibitor
338	-57.47	cp	BRD-K24656285	farnesol	FXR agonist
340	-57.34	cp	BRD-A48809242	IB-MECA	Adenosine receptor agonist
345	-56.99	cp	BRD-A43082555	loxoprofen	Cyclooxygenase inhibitor
347	-56.84	cp	BRD-K05901394	terguride	Dopamine receptor agonist
348	-56.7	cp	BRD-K47761761	PD-168077	Dopamine receptor agonist
349	-56.61	cp	BRD-K02953697	naringin	Cytochrome P450 inhibitor
350	-56.41	cp	BRD-K55930204	phenytoin	Hydantoin antiepileptic
352	-56.23	cp	BRD-K48427617	U-0124	MEK inhibitor
354	-56.22	cp	BRD-K72024482	MRS-1754	Adenosine receptor antagonist
355	-56.17	cp	BRD-K21520694	sulfacetamide	PABA antagonist
356	-56.05	cp	BRD-K52662033	lidocaine	Histamine receptor agonist
357	-55.85	cp	BRD-K84141129	VU-0400193-3	Glutamate receptor modulator
358	-55.59	cp	BRD-K95402279	geranylgeraniol	Farnesyltransferase inhibitor
359	-55.5	cp	BRD-K18895904	olanzapine	Dopamine receptor antagonist
361	-55.24	cp	BRD-A44551378	LFM-A12	EGFR inhibitor
362	-55.16	cp	BRD-K18905250	ST-91	Adrenergic receptor agonist
363	-55.14	cp	BRD-A00267231	hemado	Adenosine receptor agonist
364	-55.06	cp	BRD-A18043272	phensuximide	Succinimide antiepileptic
367	-55.05	cp	BRD-K07265709	razoxane	Chelating agent
375	-54.87	cp	BRD-K39733634	L-161982	Prostanoid receptor antagonist
378	-54.27	cp	BRD-K67013324	luzindole	Melatonin receptor antagonist
380	-54.09	cp	BRD-K22631935	neurodazine	Neurogenesis of non-pluripotent C2C12 myoblast inducer
384	-53.92	cp	BRD-A06390036	hydroquinidine	Antiarrhythmic
388	-53.91	cp	BRD-K62353524	DY-131	Estrogen receptor agonist
391	-53.8	cp	BRD-K95655893	MAZ-51	VEGFR inhibitor
392	-53.77	cp	BRD-K34437622	BRD-K34437622	Thymidylate synthase inhibitor
394	-53.57	cp	BRD-K62012036	acitretin	Retinoid receptor agonist
395	-53.29	cp	BRD-K86887724	dofetilide	Potassium channel blocker
396	-53.15	cp	BRD-A84493640	atovaquone	Mitochondrial electron transport inhibitor
398	-53.12	cp	BRD-A15493168	tetracycline	Bacterial 30S ribosomal subunit inhibitor
402	-52.89	cp	BRD-A14966924	alaproclate	Serotonin receptor antagonist
403	-52.86	cp	BRD-K49519144	LY-2140023	Glutamate receptor agonist
405	-52.54	cp	BRD-A09495397	bicuculline	GABA receptor antagonist
406	-52.29	cp	BRD-K90259198	W-7	Calmodulin antagonist
408	-52.11	cp	BRD-K96527333	dehydroisoandosterone	GABA receptor modulator
409	-51.79	cp	BRD-K89687904	PKCbeta-inhibitor	PKC inhibitor
415	-50.45	cp	BRD-K92726801	hydrastinine	Haemostatic agent
421	-50.4	cp	BRD-K08273968	griseofulvin	Tubulin inhibitor
425	-49.95	cp	BRD-K14696368	9-methyl-5H-6-thia-4,5-diaza-chrysene-6,6-dioxide	NFkB pathway inhibitor
428	-49.68	cp	BRD-K48935217	epothilone	Microtubule inhibitor
429	-49.2	cp	BRD-K23913458	coumarin	Vitamin K antagonist
431	-48.84	cp	BRD-A28746609	paclitaxel	Tubulin inhibitor
432	-48.58	cp	BRD-K41996876	tyrphostin-1	EGFR inhibitor
433	-48.24	cp	BRD-K77998258	ganglioside	SRC activator
435	-47.77	cp	BRD-K98521173	desoxycortone	Mineralocorticoid receptor agonist
436	-47.48	cp	BRD-K33396764	alpha-linolenic-acid	Omega 3 fatty acid stimulant
437	-47.41	cp	BRD-K60690191	MPEP	Glutamate receptor antagonist
438	-47.31	cp	BRD-A44008656	doxylamine	Histamine receptor antagonist
441	-46.84	cp	BRD-K52512893	SC-19220	Prostanoid receptor antagonist
442	-46.6	cp	BRD-K86191271	cytosporone-b	NUR77 receptor agonist
450	-46.44	cp	BRD-K28137194	loreclezole	GABA receptor agonist
452	-46.23	cp	BRD-K96144918	mead-acid	KPL-1 tumor suppressor
456	-46.15	cp	BRD-A91699651	chloroquine	Antimalarial
459	-45.76	cp	BRD-K40619305	larixinic-acid	Compound that interacts with metal centers
460	-45.58	cp	BRD-K70881766	solanine	Acetylcholinesterase inhibitor
462	-45.53	cp	BRD-K35377380	I-OMe-AG-538	IGF-1 inhibitor
475	-45.26	cp	BRD-A14574269	UB-165	Acetylcholine receptor agonist
476	-45.24	cp	BRD-A97104540	fenoterol	Adrenergic receptor agonist
477	-45.1	cp	BRD-M30523314	vinorelbine	Tubulin inhibitor
478	-45.1	cp	BRD-K08109516	L-701324	Glutamate receptor antagonist
479	-45.09	cp	BRD-K83636919	entacapone	Catechol O methyltransferase inhibitor
480	-45.07	cp	BRD-K85013741	auraptene	Nitric oxide production inhibitor
482	-44.67	cp	BRD-K81169441	cerivastatin	HMGCR inhibitor
486	-44.58	cp	BRD-A17448384	beclometasone	Glucocorticoid receptor agonist
487	-44.16	cp	BRD-K11853856	PJ-34	PARP inhibitor
489	-44.14	cp	BRD-K74430258	1,2-dichlorobenzene	Hepatotoxicant
491	-44.01	cp	BRD-K61341215	vecuronium	Acetylcholine receptor antagonist
495	-43.93	cp	BRD-A26845397	isamoltan	Adrenergic receptor antagonist
499	-43.88	cp	BRD-A48430263	pioglitazone	Insulin sensitizer
506	-43.74	cp	BRD-A41145729	methoprene-acid	Retinoid receptor agonist
507	-43.02	cp	BRD-K26657438	imiquimod	TLR agonist
512	-43	cp	BRD-K18678457	ZD-7288	HCN channel blocker
514	-42.91	cp	BRD-K94919853	10H-phenothiazin-10-yl)(p-tolyl)methanone	Butyrylcholinesterase inhibitor
517	-42.9	cp	BRD-K38323065	phenacetin	Cyclooxygenase inhibitor
525	-42.87	cp	BRD-A38913120	BH3I-1	BCL inhibitor
528	-42.85	cp	BRD-K62374253	rufloxacin	Bacterial DNA gyrase inhibitor
534	-42.85	cp	BRD-K84566043	fenpiverinium	Acetylcholine receptor antagonist
538	-42.65	cp	BRD-A09062839	amylocaine	Local anesthetic
542	-42.26	cp	BRD-K89046952	ciclacillin	Bacterial cell wall synthesis inhibitor
543	-42.2	cp	BRD-A35511923	L-803087	Somatostatin receptor agonist
544	-42.06	cp	BRD-K84639753	safinamide	Dopamine uptake inhibitor
553	-41.82	cp	BRD-A85860691	chaetocin	Histone lysine methyltransferase inhibitor
558	-41.62	cp	BRD-A65280694	molindone	Dopamine receptor antagonist
564	-41.57	cp	BRD-K05673000	dicloxacillin	Bacterial cell wall synthesis inhibitor
565	-41.52	cp	BRD-K88741031	methyl-2,5-dihydroxycinnamate	EGFR inhibitor
567	-41.5	cp	BRD-K33226500	indinavir	HIV protease inhibitor
568	-41.36	cp	BRD-K85925969	zalcitabine	Nucleoside reverse transcriptase inhibitor
571	-41.31	cp	BRD-K88358234	xaliproden	Serotonin receptor agonist
575	-40.8	cp	BRD-K04170657	psoromic-acid	Ras GTPase inhibitor
577	-40.48	cp	BRD-K28470988	L-690330	Inositol monophosphatase inhibitor
581	-40.01	cp	BRD-A29731977	17-hydroxyprogesterone-caproate	progesterone receptor agonist
583	-39.91	cp	BRD-A65440446	cimaterol	Adrenergic receptor agonist
588	-39.87	cp	BRD-A62057054	MDL-11939	Serotonin receptor antagonist
593	-39.85	cp	BRD-K54316499	tolterodine	Acetylcholine receptor antagonist
595	-39.6	cp	BRD-A71657825	2-(biphenyl-4-ylsulfonamido)pentanedioic-acid	Matrix metalloprotease inhibitor
597	-39.56	cp	BRD-K28667196	fillalbin	Increases arterial blood pressure
603	-39.52	cp	BRD-K46317332	proadifen	Nitric oxide synthase inhibitor
604	-39.51	cp	BRD-K24538644	KUC104502N	-666
607	-39.47	cp	BRD-A08709697	heliotrine	Pyrrolizidine alkaloid
609	-39.36	cp	BRD-A92826379	lupanine	Sodium channel blocker
619	-39.32	cp	BRD-K43978949	PIT	Purinergic receptor antagonist
622	-38.97	cp	BRD-K15402119	huperzine-a	Acetylcholinesterase inhibitor
623	-38.75	cp	BRD-K80725821	RS-16566	Serotonin receptor antagonist
632	-38.36	cp	BRD-K37720887	SB-525334	TGF beta receptor inhibitor
638	-38.31	cp	BRD-A20968261	WAY-213613	Glutamate inhibitor
641	-37.82	cp	BRD-K43245338	MDL-28170	Calpain inhibitor
645	-37.54	cp	BRD-K46742498	alosetron	Serotonin receptor antagonist
646	-37.46	cp	BRD-A79803969	memantine	Glutamate receptor antagonist
655	-37.4	cp	BRD-A98431941	ephedrine	Adrenergic receptor agonist
662	-37.37	cp	BRD-A35338386	NECA	Adenosine receptor agonist
663	-37.23	cp	BRD-K15933101	ropinirole	Dopamine receptor agonist
665	-36.05	cp	BRD-K09764130	mead-ethanolamide	Cannabinoid receptor agonist
667	-35.88	cp	BRD-A62071884	siguazodan	Phosphodiesterase inhibitor
669	-35.71	cp	BRD-A22769835	homochlorcyclizine	Antihistamine
670	-35.38	cp	BRD-A17411484	carprofen	Cyclooxygenase inhibitor
681	-35.35	cp	BRD-A50157456	terbutaline	Adrenergic receptor agonist
682	-34.83	cp	BRD-K59851896	calycanthine	GABA release inhibitor
687	-34.8	cp	BRD-K91623615	ABT-751	Tubulin inhibitor
689	-34.6	cp	BRD-K68246049	TTNPB	Retinoid receptor agonist
690	-34.58	cp	BRD-K36395411	SB-206553	Serotonin receptor antagonist
701	-34.07	cp	BRD-A24191444	ifenprodil	Adrenergic receptor antagonist
703	-33.99	cp	BRD-K31054881	BMY-7378	Adrenergic receptor antagonist
704	-33.87	cp	BRD-A01295252	trans-7-hydroxy-pipat	Dopamine receptor ligand
707	-33.76	cp	BRD-K01902415	pirinixic-acid	PPAR receptor agonist
717	-33.75	cp	BRD-K67080878	milrinone	Phosphodiesterase inhibitor
720	-33.73	cp	BRD-K46068882	eugenitol	Bacterial quorum sensing inhibitor
722	-33.69	cp	BRD-K45446451	JZL-184	Monoacylglucerol lipase inhibitor
726	-33.54	cp	BRD-K13819402	desoxypeganine	Acetylcholinesterase inhibitor
727	-33.49	cp	BRD-K60770992	pergolide	Dopamine receptor agonist
734	-33.24	cp	BRD-K92984783	melperone	Serotonin receptor antagonist
740	-33.18	cp	BRD-K63923597	barasertib	Aurora kinase inhibitor
742	-33.17	cp	BRD-K60511616	pravastatin	HMGCR inhibitor
745	-33.13	cp	BRD-K15262564	mupirocin	Isoleucyl-tRNA synthetase inhibitor
763	-33	cp	BRD-K84175871	pseudoephedrine	Adrenergic receptor agonist
764	-32.91	cp	BRD-K38055836	etamivan	Respiratory stimulant
777	-32.78	cp	BRD-K25906698	immepip	Histamine receptor agonist
782	-32.45	cp	BRD-K51941867	LM-1685	Cyclooxygenase inhibitor
787	-32.4	cp	BRD-K32164935	tolazamide	ATP channel blocker
793	-32.38	cp	BRD-K00317371	RITA	MDM inhibitor
797	-32.08	cp	BRD-A10523515	GSK-429286A	Rho associated kinase inhibitor
803	-32.06	cp	BRD-K02404261	caffeine	Adenosine receptor antagonist
804	-31.94	cp	BRD-K95851186	CGP-13501	GABA receptor modulator
806	-31.74	cp	BRD-K71823332	epothilone-a	Microtubule stabilizing agent
810	-31.63	cp	BRD-K32412559	morphothebaine	Adrenergic receptor antagonist
811	-31.59	cp	BRD-K99411983	lumicolchicine	Colchicine isomer, non-binder of microtubules
831	-31.37	cp	BRD-K20285085	fostamatinib	SYK inhibitor
841	-31.31	cp	BRD-K45988865	tetramethylsilane	Internal standard for NMR spectroscopy
842	-31.28	cp	BRD-A59808129	guggulsterone	Cholesterol inhibitor
843	-31.15	cp	BRD-K89014967	AS-703026	MEK inhibitor
844	-31.14	cp	BRD-K67261995	adipiodone	Contrast agent
852	-31.1	cp	BRD-K14693417	cinchonine	P-glycoprotein inhibitor
861	-30.74	cp	BRD-A34706053	CGP-12177	Adrenergic receptor agonist
869	-30.4	cp	BRD-K17294426	clebopride	Dopamine receptor antagonist
872	-30.31	cp	BRD-K63089472	farnesylthioacetic-acid	Inhibitor of methyl esterification of farnesylated proteins
873	-30.28	cp	BRD-K52075715	oxibendazole	Tubulin inhibitor
878	-30.25	cp	BRD-A98702003	carbenoxolone	11-beta-HSD1 inhibitor
880	-30.22	cp	BRD-K82109576	vincristine	Tubulin inhibitor
881	-30.16	cp	BRD-A20239487	atenolol	Adrenergic receptor antagonist
887	-29.73	cp	BRD-K92778217	mefenamic-acid	Cyclooxygenase inhibitor
891	-29.72	cp	BRD-K63792901	arecaidine	Acetylcholine receptor agonist
894	-29.42	cp	BRD-A09539288	homatropine	Acetylcholine receptor antagonist
896	-29.28	cp	BRD-K90885812	propantheline	Acetylcholine receptor antagonist
897	-29.13	cp	BRD-A01317026	7,8-dihydro-L-biopterin	Dihydroneopterin aldolase inhibitor
898	-28.78	cp	BRD-K70241288	L-692585	Growth hormone releasing peptide ligand agonist
901	-28.66	cp	BRD-A49734948	foliosidine	Plant alkaloid
904	-28.26	cp	BRD-K63195589	tipifarnib	Farnesyltransferase inhibitor
908	-28.25	cp	BRD-K16977723	PP-3	EGFR inhibitor
912	-28.22	cp	BRD-K20197062	SA-94315	Caspase inhibitor
913	-28.18	cp	BRD-A14985772	ascorbyl-palmitate	antioxidant
914	-28.17	cp	BRD-A36707673	hydroxycholesterol	LXR agonist
915	-28.03	cp	BRD-A24228527	ofloxacin	Bacterial DNA gyrase inhibitor
921	-27.95	cp	BRD-K53570330	carbofuran	Cholinesterase inhibitor
922	-27.82	cp	BRD-K99451608	lopinavir	HIV protease inhibitor
923	-27.82	cp	BRD-A41112154	oleanolic-acid	G protein-coupled receptor agonist
928	-27.73	cp	BRD-A36074203	remacemide	Glutamate receptor antagonist
955	-27.69	cp	BRD-A89175223	bisoprolol	Adrenergic receptor antagonist
957	-27.63	cp	BRD-K82562631	tolmetin	Cyclooxygenase inhibitor
958	-27.23	cp	BRD-K78637815	LY-320135	Cannabinoid receptor antagonist
961	-27.22	cp	BRD-K06024458	n-arachidonyl-GABA	cannabinoid receptor agonist
966	-27.07	cp	BRD-A88282067	delcorine	Antiarrhythmic
985	-26.86	cp	BRD-K16195444	oxymetazoline	Adrenergic receptor agonist
989	-26.85	cp	BRD-K54790157	trioxsalen	DNA synthesis inhibitor
991	-26.67	cp	BRD-K68190965	GR-46611	Serotonin receptor agonist
992	-26.66	cp	BRD-K52394958	GR-159897	Tachykinin antagonist
1015	-26.64	cp	BRD-A37492983	iocetamic-acid	Radiopaque medium
1018	-26.56	cp	BRD-A15435692	BMY-14802	Sigma receptor antagonist
1022	-26.55	cp	BRD-A83855350	naltrexone	Opioid receptor antagonist
1027	-26.5	cp	BRD-K73319509	PF-04217903	c-Met inhibitor
1028	-26.45	cp	BRD-K50388907	fenofibrate	PPAR receptor agonist
1029	-26.41	cp	BRD-K23922020	arecaidine	Acetylcholine receptor agonist
1032	-26.39	cp	BRD-K98769987	flumazenil	Benzodiazepine receptor antagonist
1036	-26.27	cp	BRD-K36740062	GSK-1070916	Aurora kinase inhibitor
1044	-26.12	cp	BRD-K49027941	PSB-1115	Adenosine receptor antagonist
1058	-26.06	cp	BRD-K59037100	oxybenzone	Lipase inhibitor
1060	-26	cp	BRD-K31699485	DMEOB	glutamate receptor modulator
1065	-25.74	cp	BRD-K09255212	clioquinol	Chelating agent
1077	-25.51	cp	BRD-K74765201	tomelukast	Leukotriene receptor antagonist
1079	-25.02	cp	BRD-K54472332	elvitegravir	HIV integrase inhibitor
1088	-25.01	cp	BRD-K53545112	CNQX	Glutamate receptor antagonist
1090	-24.95	cp	BRD-A22707317	SB-205384	GABA receptor modulator
1099	-24.93	cp	BRD-A04706586	bucladesine	Adenosine receptor agonist
1109	-24.81	cp	BRD-K56596464	QX-314	Sodium channel blocker
1110	-24.8	cp	BRD-K77625572	etomoxir	Carnitine palmitoyltransferase inhibitor
1111	-24.77	cp	BRD-K32795028	1-benzylimidazole	Thromboxane synthase inhibitor
1113	-24.74	cp	BRD-K08998509	fananserin	Dopamine receptor antagonist
1115	-24.64	cp	BRD-K55424922	anpirtoline	Serotonin receptor agonist
1116	-24.58	cp	BRD-K59650319	YM-298198	Glutamate receptor antagonist
1117	-24.57	cp	BRD-K26979635	NS-3694	Glutamate receptor antagonist
1121	-24.49	cp	BRD-K53318339	vinpocetine	Phosphodiesterase inhibitor
1129	-24.42	cp	BRD-A92670106	tocainide	Sodium channel blocker
1130	-24.35	cp	BRD-K40578143	GR-79236	Adenosine receptor agonist
1136	-24.25	cp	BRD-A10070317	propranolol	Adrenergic receptor antagonist
1139	-24.25	cp	BRD-K53878242	MMPX	Phosphodiesterase inhibitor
1149	-24.16	cp	BRD-K10176267	L-701252	Glutamate receptor antagonist
1152	-24.15	cp	BRD-A79903587	tegafur	Thymidylate synthase inhibitor
1168	-24.14	cp	BRD-K89708791	rifaximin	RNA synthesis inhibitor
1172	-24.14	cp	BRD-K11158509	tyrphostin-B44	EGFR inhibitor
1176	-24.14	cp	BRD-K27450477	EHNA	Adenosine deaminase inhibitor
1177	-23.95	cp	BRD-K45252063	clofibrate	PPAR receptor agonist
1179	-23.84	cp	BRD-U97083655	teicoplanin	Bacterial cell wall synthesis inhibitor
1180	-23.59	cp	BRD-K83322645	L-693403	Sigma receptor agonist
1184	-23.58	cp	BRD-K80778372	RO-19-4605	GABA benzodiazepine site receptor inverse agonist
1190	-23.56	cp	BRD-K17868609	BRL-54443	Serotonin receptor agonist
1199	-23.41	cp	BRD-A38898897	GW-311616	Leukocyte elastase inhibitor
1205	-23.41	cp	BRD-K48692744	NU-1025	PARP inhibitor
1209	-23.28	cp	BRD-K92731339	perindopril	ACE inhibitor
1221	-23.24	cp	BRD-K24526313	levcromakalim	Potassium channel activator
1223	-23.23	cp	BRD-K63151507	MNITMT	Lymphocyte inhibitor
1238	-23.2	cp	BRD-K26548821	quinpirole	Dopamine receptor agonist
1242	-23.01	cp	BRD-A62890442	3-methyl-GABA	GABA aminotransferase activator
1253	-22.87	cp	BRD-A15297126	fluocinonide	Glucocorticoid receptor agonist
1257	-22.82	cp	BRD-K33572481	taurodeoxycholic-acid	Bile acid
1258	-22.81	cp	BRD-A85025557	NCS-382	GABA receptor antagonist
1259	-22.74	cp	BRD-K14888893	minoxidil	KATP activator
1266	-22.69	cp	BRD-K19533706	tranilast	Angiogenesis inhibitor
1279	-22.65	cp	BRD-A38749782	fludrocortisone	Glucocorticoid receptor agonist
1293	-22.55	cp	BRD-K32584078	BML-257	AKT inhibitor
1302	-22.52	cp	BRD-K36965586	m-chlorophenylbiguanide	Serotonin receptor agonist
1303	-22.5	cp	BRD-A09467419	mebeverine	Acetylcholine receptor antagonist
1305	-22.41	cp	BRD-K68191783	ALW-II-38-3	Ephrin inhibitor
1307	-22.38	cp	BRD-A39268308	epibatidine	Acetylcholine receptor agonist
1308	-22.29	cp	BRD-K61217870	n-(3-acetamidophenyl)-3-chlorobenzamide	Glutamate receptor antagonist
1311	-22.15	cp	BRD-A19053259	pseudopelletierine	Anthelmintic
1323	-22.12	cp	BRD-K69690935	curcumin	Cyclooxygenase inhibitor
1325	-22.09	cp	BRD-A92439610	triamcinolone	Glucocorticoid receptor agonist
1335	-22.06	cp	BRD-K46142322	RS-67333	Serotonin receptor partial agonist
1338	-22.01	cp	BRD-K77171813	proxyfan	Histamine receptor modulator
1346	-21.89	cp	BRD-A29437505	RWJ-21757	TLR agonist
1357	-21.76	cp	BRD-K08640512	RS-100329	Adrenergic receptor antagonist
1364	-21.57	cp	BRD-K62206109	VUF-5681	Histamine receptor antagonist
1366	-21.31	cp	BRD-A83695761	chromanol	Potassium channel blocker
1371	-21.1	cp	BRD-K27184429	levocetirizine	Histamine receptor antagonist
1382	-21.1	cp	BRD-A69636825	diltiazem	Calcium channel blocker
1384	-21.05	cp	BRD-A15914070	4-hydroxy-2-nonenal	Cytotoxic lipid peroxidation product
1399	-21.02	cp	BRD-A17819071	gedunin	HSP inhibitor
1413	-20.9	cp	BRD-K41143549	BRD-K41143549	Glutamate receptor antagonist
1415	-20.79	cp	BRD-K98426715	tubacin	HDAC inhibitor
1419	-20.77	cp	BRD-K06208435	YS-035	Calcium channel blocker
1424	-20.76	cp	BRD-A79981887	midodrine	Adrenergic receptor agonist
1426	-20.76	cp	BRD-A71157293	fursultiamine	Vitamin B
1431	-20.68	cp	BRD-K30480208	torasemide	Electrolyte reabsorption inhibitor
1432	-20.64	cp	BRD-K84987553	MDM2-inhibitor	MDM inhibitor
1433	-20.64	cp	BRD-K21548250	moracizine	Sodium channel blocker
1442	-20.61	cp	BRD-A10355991	norketamine	Glutamate receptor antagonist
1452	-20.57	cp	BRD-A32164164	methyllycaconitine	Acetylcholine receptor antagonist
1462	-20.53	cp	BRD-K95237249	probenecid	Uricosuric blocker
1464	-20.46	cp	BRD-K57546357	prunetin	Breast cancer resistance protein inhibitor
1468	-20.21	cp	BRD-K34014345	naproxol	Anti-inflammatory
1472	-20.13	cp	BRD-A41555725	chlortetracycline	Protein synthesis inhibitor
1473	-19.99	cp	BRD-A37052580	physostigmine	Acetylcholinesterase inhibitor
1475	-19.68	cp	BRD-A47494775	dipivefrine	Adrenergic receptor agonist
1478	-19.65	cp	BRD-A19195498	trimipramine	Norepinephrine reuptake inhibitor
1483	-19.64	cp	BRD-K88701661	dimercaptosuccinic-acid	Chelating agent
1486	-19.63	cp	BRD-K73589401	corticosterone	mineralocorticoid receptor agonist
1491	-19.59	cp	BRD-A67748489	K3644	Kinesin-like spindle protein inhibitor
1496	-19.51	cp	BRD-K43797669	genistein	Tyrosine kinase inhibitor
1497	-19.38	cp	BRD-A30815329	felodipine	Calcium channel blocker
1500	-19.3	cp	BRD-K66876909	linezolid	Bacterial 50S ribosomal subunit inhibitor
1501	-19.28	cp	BRD-A99571536	dubinidine	Anti-epileptic
1504	-19.2	cp	BRD-A73605923	mocimycin	Protein synthesis inhibitor
1505	-19.16	cp	BRD-K52721684	PCO-400	Potassium channel activator
1525	-19.08	cp	BRD-K26801045	pipamperone	Dopamine receptor antagonist
1526	-19.02	cp	BRD-A90311807	cilastatin	Dehydropeptidase inhibitor
1530	-18.52	cp	BRD-K03981224	ethisterone	Progestogen hormone
1531	-18.4	cp	BRD-K77677632	SB-200646	Serotonin receptor antagonist
1536	-18.3	cp	BRD-K97158071	droperidol	Dopamine receptor antagonist
1543	-18.28	cp	BRD-K33193182	methylnorlichexanthone	Aurora kinase inhibitor
1548	-18.23	cp	BRD-A08877921	cephalotaxine	Protein synthesis inhibitor
1559	-17.82	cp	BRD-K15588452	R-96544	Serotonin receptor antagonist
1562	-17.7	cp	BRD-K29582115	ziprasidone	Dopamine receptor antagonist
1567	-17.59	cp	BRD-K22096725	ALW-II-49-7	Ephrin inhibitor
1571	-17.51	cp	BRD-K08619838	tremorine	Acetylcholine receptor agonist
1577	-17.46	cp	BRD-K41337261	ZM-306416	ABL inhibitor
1584	-17.4	cp	BRD-A55815733	phylloquinone	Vitamin K
1589	-17.26	cp	BRD-A84174393	meloxicam	Cyclooxygenase inhibitor
1590	-17.11	cp	BRD-A65597028	RX-821002	Adrenergic receptor antagonist
1596	-17.08	cp	BRD-K39339537	epirizole	Cyclooxygenase inhibitor
1607	-17.01	cp	BRD-K06159959	CCMQ	Inhibitor of the binding of homoquinolinic acid to non-NMDA sensitive sites
1609	-16.59	cp	BRD-K60174629	z-prolyl-prolinal	Prolyl endopeptidase inhibitor
1616	-16.52	cp	BRD-K44876623	zolpidem	Benzodiazepine receptor agonist
1629	-16.37	cp	BRD-K74195153	irsogladine	Phosphodiesterase inhibitor
1631	-16.36	cp	BRD-K50384076	7,4'-dihydroxyflavone	Opioid receptor antagonist
1639	-16.34	cp	BRD-K12516989	zaprinast	Phosphodiesterase inhibitor
1648	-15.98	cp	BRD-K01624546	docosatrienoic-acid	LTB4 inhibitor
1651	-15.92	cp	BRD-A11605036	thiocolchicoside	GABA receptor antagonist
1652	-15.8	cp	BRD-K47539947	tetradecylthioacetic-acid	Lipid peroxidase inhibitor
1654	-15.79	cp	BRD-K18757346	U-46619	Thromboxane receptor agonist
1655	-15.78	cp	BRD-A75552914	isoxicam	Cyclooxygenase inhibitor
1666	-15.59	cp	BRD-K09635134	l-erythro-MAPP	negative control for D-erythro-MAPP
1672	-15.54	cp	BRD-K61951118	FG-7142	GABA benzodiazepine site receptor inverse agonist
1679	-15.52	cp	BRD-K62609077	scoulerine	Adrenergic receptor antagonist
1686	-15.42	cp	BRD-A65615053	zacopride	Serotonin receptor antagonist
1687	-15.41	cp	BRD-K05977355	fluconazole	Sterol demethylase inhibitor
1690	-15.32	cp	BRD-K72420232	WZ-4002	EGFR inhibitor
1693	-15.24	cp	BRD-K59633790	VU-0420363-1	SARS coronavirus 3C-like protease inhibitor
1696	-15.22	cp	BRD-K57569181	pentoxifylline	Phosphodiesterase inhibitor
1698	-15.16	cp	BRD-A25067867	benzatropine	Acetylcholine receptor antagonist
1699	-14.97	cp	BRD-K27305650	LY-294002	MTOR inhibitor
1701	-14.96	cp	BRD-K77695569	tiabendazole	Angiogenesis inhibitor
1712	-14.92	cp	BRD-A80928489	1-monopalmitin	P-glycoprotein inhibitor
1733	-14.85	cp	BRD-K97564742	mepyramine	Histamine receptor antagonist
1735	-14.84	cp	BRD-K28075147	biochanin-a	Estrogen receptor agonist
1737	-14.84	cp	BRD-K37456065	VU-0365114-2	M5 modulator
1738	-14.57	cp	BRD-K99447003	enalaprilat	ACE inhibitor
1739	-14.5	cp	BRD-A26095496	clobetasol	Glucocorticoid receptor agonist
1754	-14.46	cp	BRD-K48722833	iloperidone	Dopamine receptor antagonist
1760	-14.44	cp	BRD-K46018455	bezafibrate	PPAR receptor agonist
1761	-14.34	cp	BRD-K02265150	amoxapine	Norepinephrine reuptake inhibitor
1763	-14.33	cp	BRD-K66944906	fraxidin	Carbonic anhydrase inhibitor
1770	-14.17	cp	BRD-K32830106	guanfacine	Adrenergic receptor agonist
1800	-14.13	cp	BRD-A08187463	racecadotril	Enkephalinase inhibitor
1804	-14.05	cp	BRD-K55191674	benzylpenicillin	Penicillin binding protein inhibitor
1809	-14.05	cp	BRD-K50660797	epicatechin	Bacterial DNA gyrase inhibitor
1815	-14	cp	BRD-K94070024	depomedrol	Glucocorticoid receptor agonist
1820	-13.99	cp	BRD-K91900765	VX-745	p38 MAPK inhibitor
1849	-13.89	cp	BRD-A57457122	VU-0400071-3	Glutamate receptor modulator
1860	-13.82	cp	BRD-K37846922	3,3'-diindolylmethane	CHK inhibitor
1861	-13.78	cp	BRD-K37561857	zardaverine	Phosphodiesterase inhibitor
1862	-13.62	cp	BRD-K90333595	phentolamine	Adrenergic receptor antagonist
1863	-13.53	cp	BRD-A61858259	CAY-10415	Insulin sensitizer
1871	-13.45	cp	BRD-K94353609	fluocinolone	Glucocorticoid receptor agonist
1872	-13.27	cp	BRD-K49519092	immethridine	Histamine receptor agonist
1890	-13.1	cp	BRD-K63784565	BRD-K63784565	Topoisomerase inhibitor
1898	-13.05	cp	BRD-K74141488	naftifine	Fungal squalene epoxidase inhibitor
1912	-13.02	cp	BRD-K64514229	toltrazuril	Antiprotozoal
1916	-12.98	cp	BRD-K17306061	aprepitant	Tachykinin antagonist
1927	-12.97	cp	BRD-K05395900	nicotine	Acetylcholine receptor agonist
1928	-12.86	cp	BRD-A03359064	ICI-89406	Adrenergic receptor antagonist
1941	-12.82	cp	BRD-K85119730	tolbutamide	ATP channel blocker
1947	-12.67	cp	BRD-K68174511	torin-2	MTOR inhibitor
1951	-12.66	cp	BRD-A09533288	verapamil	Calcium channel blocker
1953	-12.62	cp	BRD-K52751261	TAK-715	p38 MAPK inhibitor
1954	-12.62	cp	BRD-K46441700	GR-55562	Serotonin receptor antagonist
1959	-12.49	cp	BRD-A25004090	erastin	Ion channel antagonist
1977	-12.41	cp	BRD-A85587465	bemesetron	Serotonin receptor antagonist
1980	-12.37	cp	BRD-A37347161	BRL-52537	Opioid receptor agonist
1986	-12.22	cp	BRD-K32755366	reserpic-acid	Norepinephrine transporter inhibitor
1990	-12.14	cp	BRD-K93618743	ipriflavone	Bone resorption inhibitor
1993	-12.11	cp	BRD-K99029477	prometon	Photosynthesis inhibitor
1995	-12.1	cp	BRD-K70505054	ranitidine	Histamine receptor antagonist
1999	-12.04	cp	BRD-A73859745	glycodeoxycholic-acid	Apoptosis stimulant
2001	-12.01	cp	BRD-K76568384	PHTPP	Estrogen receptor antagonist
2002	-11.89	cp	BRD-K79425933	benperidol	Dopamine receptor antagonist
2003	-11.88	cp	BRD-K93645900	tadalafil	Phosphodiesterase inhibitor
2010	-11.74	cp	BRD-A12016240	LY-278584	Serotonin receptor antagonist
2012	-11.73	cp	BRD-A54490543	pirlindole	Monoamine oxidase inhibitor
2016	-11.68	cp	BRD-A41722204	sulmazole	Adenosine receptor antagonist
2017	-11.63	cp	BRD-K25905511	buddleoflavonoloside	Acetylcholinesterase inhibitor
2022	-11.61	cp	BRD-A24543851	nornicotine	Acetylcholine receptor agonist
2027	-11.57	cp	BRD-K55703048	latrepirdine	Glutamate receptor antagonist
2030	-11.57	cp	BRD-K84266862	BRL-50481	Phosphodiesterase inhibitor
2038	-11.55	cp	BRD-K32247306	primidone	GABA receptor antagonist
2041	-11.53	cp	BRD-K79116891	proxymetacaine	Sodium channel blocker
2046	-11.51	cp	BRD-K72264770	QW-BI-011	Histone lysine methyltransferase inhibitor
2049	-11.51	cp	BRD-K77641333	naphazoline	Adrenergic receptor agonist
2050	-11.44	cp	BRD-A91866971	SQ-29548	Thromboxane receptor antagonist
2081	-11.37	cp	BRD-K35723520	darinaparsin	Apoptosis stimulant
2084	-11.13	cp	BRD-K18194590	mephentermine	Adrenergic receptor agonist
2088	-11.13	cp	BRD-K34098590	tienilic-acid	Sodium/potassium/chloride transporter inhibitor
2089	-11.08	cp	BRD-K54771420	glycocholic-acid	Cholesterol inhibitor
2091	-11.06	cp	BRD-K41160163	fenobam	Glutamate receptor antagonist
2095	-10.95	cp	BRD-K93258693	GW-9662	PPAR receptor antagonist
2099	-10.9	cp	BRD-K68341547	W-9	Calmodulin antagonist
2105	-10.8	cp	BRD-K23204545	busulfan	DNA inhibitor
2110	-10.74	cp	BRD-K39569857	avrainvillamide-analog-3	nucleophosmin inhibitor
2122	-10.72	cp	BRD-K75699339	rizatriptan	Serotonin receptor agonist
2123	-10.62	cp	BRD-K31611373	fluprostenol	Prostanoid receptor agonist
2124	-10.56	cp	BRD-K77925998	quipazine	Serotonin receptor agonist
2125	-10.54	cp	BRD-K56064827	EI-273	PKC inhibitor
2133	-10.49	cp	BRD-A09161221	nomilin	HSP inhibitor
2138	-10.45	cp	BRD-K81839095	estrone	Estrogen receptor agonist
2139	-10.44	cp	BRD-A22143024	estropipate	Estrogen receptor agonist
2146	-10.44	cp	BRD-A16311756	profenamine	Butyrylcholinesterase inhibitor
2149	-10.41	cp	BRD-A13084692	troglitazone	Insulin sensitizer
2156	-10.4	cp	BRD-A54487287	cortisone	Glucocorticoid receptor agonist
2162	-10.4	cp	BRD-A15034104	bergenin	Interleukin inhibitor
2163	-10.36	cp	BRD-K36258877	AZ-10417808	Caspase inhibitor
2164	-10.33	cp	BRD-K47639036	flavoxate	Acetylcholine receptor antagonist
2168	-10.17	cp	BRD-K15086322	JNJ-10191584	Histamine receptor antagonist
2172	-10.14	cp	BRD-A14395271	mesoridazine	Dopamine receptor antagonist
2176	-9.99	cp	BRD-K43860855	iobenguane	Antineoplastic
2177	-9.95	cp	BRD-K05658747	raltegravir	HIV integrase inhibitor
2178	-9.91	cp	BRD-K94830329	ataluren	CFTR channel agonist
2184	-9.86	cp	BRD-K70976396	cefoxitin	Bacterial cell wall synthesis inhibitor
2186	-9.75	cp	BRD-A23359898	sibutramine	Serotonin reuptake inhibitor
2192	-9.68	cp	BRD-K98763141	niflumic-acid	Cyclooxygenase inhibitor
2204	-9.67	cp	BRD-A79314293	cephalosporanic-acid	Bacterial cell wall synthesis inhibitor
2211	-9.67	cp	BRD-K68095457	palmitoylethanolamide	Cannabinoid receptor agonist
2213	-9.56	cp	BRD-A64092382	mexiletine	Sodium channel blocker
2214	-9.52	cp	BRD-K00662280	CL-218872	GABA receptor agonist
2218	-9.51	cp	BRD-A10715913	sulpiride	Dopamine receptor antagonist
2219	-9.44	cp	BRD-K02715688	hydrastine	Tyrosine hydroxylase inhibitor
2224	-9.42	cp	BRD-K62965247	tipifarnib-P2	farnesyltransferase inhibitor
2225	-9.42	cp	BRD-K79366068	PSB-069	NTPDase inhibitor
2228	-9.41	cp	BRD-K40965114	cyanopindolol	Adrenergic receptor antagonist
2234	-9.3	cp	BRD-K99063460	didanosine	Nucleoside reverse transcriptase inhibitor
2237	-9.27	cp	BRD-A91555231	norepinephrine	Adrenergic receptor agonist
2243	-9.22	cp	BRD-K29733039	deforolimus	MTOR inhibitor
2250	-9.19	cp	BRD-K49671696	ketanserin	Serotonin receptor antagonist
2251	-9.16	cp	BRD-K54529596	captopril	ACE inhibitor
2252	-9.13	cp	BRD-A67981824	cefotaxime	Bacterial cell wall synthesis inhibitor
2256	-9.09	cp	BRD-K02950022	BMS-299897	Gamma secretase inhibitor
2260	-9.07	cp	BRD-A42346008	metanephrine	Epinephrine metabolite
2266	-9.06	cp	BRD-K79124250	ioxaglic-acid	Radiopaque medium
2269	-9.04	cp	BRD-K38449220	seneciphylline	Cytochrome P450 inhibitor
2271	-8.99	cp	BRD-K47717570	NBQX	Glutamate receptor antagonist
2273	-8.99	cp	BRD-K90574421	ipsapirone	Serotonin receptor agonist
2284	-8.95	cp	BRD-K04414442	SB-222200	Tachykinin antagonist
2297	-8.9	cp	BRD-A42553870	L-152804	Neuropeptide receptor antagonist
2302	-8.85	cp	BRD-K15842202	eudesmic-acid	-666
2306	-8.79	cp	BRD-K26134695	calpeptin	Calpain inhibitor
2320	-8.79	cp	BRD-K85383046	IAA-94	Chloride channel blocker
2323	-8.75	cp	BRD-K04430056	7-nitroindazole	nitric oxide synthase inhibitor
2324	-8.75	cp	BRD-A56675431	altizide	Thiazide diuretic
2332	-8.74	cp	BRD-K85402309	dovitinib	EGFR inhibitor
2333	-8.65	cp	BRD-A60070924	alpha-estradiol	Estrogen receptor agonist
2339	-8.64	cp	BRD-K09631521	thiotepa	Cytochrome P450 inhibitor
2342	-8.63	cp	BRD-K45401373	betulinic-acid	Apoptosis stimulant
2343	-8.6	cp	BRD-K50018155	RS-67506	Serotonin receptor partial agonist
2346	-8.6	cp	BRD-K53561341	KIN001-220	Aurora kinase inhibitor
2351	-8.52	cp	BRD-K16551401	PNU-22394	Serotonin receptor agonist
2353	-8.49	cp	BRD-A37817666	picrotoxin	GABA receptor antagonist
2354	-8.39	cp	BRD-A35108200	dexamethasone	Glucocorticoid receptor agonist
2356	-8.36	cp	BRD-K38903228	hesperidin	Flavanone glycoside
2360	-8.32	cp	BRD-K29905972	axitinib	PDGFR receptor inhibitor
2361	-8.32	cp	BRD-K35559145	levomepromazine	Dopamine receptor antagonist
2375	-8.3	cp	BRD-A90515964	guaifenesin	Expectorant
2377	-8.24	cp	BRD-K70281171	U-99194	Dopamine receptor antagonist
2378	-8.24	cp	BRD-K50214219	CS-1657	PARP inhibitor
2379	-8.21	cp	BRD-A43974499	reboxetine	Adrenergic receptor antagonist
2381	-8.18	cp	BRD-A87125127	3-matida	Glutamate receptor antagonist
2382	-8.15	cp	BRD-K40530731	hyoscyamine	Acetylcholine receptor antagonist
2393	-8.14	cp	BRD-K79145749	dibenzepin	Norepinephrine reuptake inhibitor
2396	-8.07	cp	BRD-K55430733	WAY-629	Serotonin receptor agonist
2403	-8.03	cp	BRD-K02275692	cefotiam	Bacterial cell wall synthesis inhibitor
2405	-8.03	cp	BRD-K45542189	diethylcarbamazine	Lipoxygenase inhibitor
2416	-7.93	cp	BRD-K06234293	LY-364947	TGF beta receptor inhibitor
2417	-7.83	cp	BRD-K50128260	sildenafil	Phosphodiesterase inhibitor
2436	-7.78	cp	BRD-A85280935	quinpirole	Dopamine receptor agonist
2437	-7.75	cp	BRD-K59597909	phenothiazine	Dopamine receptor antagonist
2441	-7.68	cp	BRD-A46179541	doxapram	Potassium channel blocker
2446	-7.63	cp	BRD-K61993165	niacin	NAD precursor with lipid lowering effects
2457	-7.58	cp	BRD-K17823458	danoprevir	HCV inhibitor
2470	-7.54	cp	BRD-K43236057	piceid	ICAM1 inhibitor
2471	-7.48	cp	BRD-K44497846	enalapril	ACE inhibitor
2476	-7.41	cp	BRD-K43164539	cholic-acid	Bile acid
2480	-7.39	cp	BRD-K08252256	diclofenac	Cyclooxygenase inhibitor
2483	-7.35	cp	BRD-A97701745	pindolol	Adrenergic receptor antagonist
2484	-7.32	cp	BRD-K70778732	trazodone	Adrenergic receptor antagonist
2493	-7.23	cp	BRD-A22844106	tenoxicam	Cyclooxygenase inhibitor
2494	-7.22	cp	BRD-A78377521	monastrol	Kinesin-like spindle protein inhibitor
2500	-7.19	cp	BRD-A09094913	strychnine	Acetylcholine receptor antagonist
2502	-7.14	cp	BRD-K42679050	Y-27152	Potassium channel activator
2509	-7.02	cp	BRD-K89997465	chlorpromazine	Dopamine receptor antagonist
2510	-6.91	cp	BRD-A93255169	thalidomide	TNF production inhibitor
2513	-6.84	cp	BRD-A20589515	dihydroxyphenylglycine	Glutamate receptor agonist
2516	-6.79	cp	BRD-A14798026	mestranol	Estrogen receptor agonist
2517	-6.78	cp	BRD-A64125466	dehydrocholic-acid	choleretic agent
2518	-6.74	cp	BRD-K81709173	halcinonide	Glucocorticoid receptor agonist
2521	-6.66	cp	BRD-K69763916	LY-341495	Glutamate receptor antagonist
2523	-6.64	cp	BRD-K64935403	ebelactone-b	Lipase inhibitor
2538	-6.62	cp	BRD-A71203467	l-stepholidine	Dopamine receptor antagonist
2539	-6.61	cp	BRD-K14791739	fluticasone	Glucocorticoid receptor agonist
2543	-6.6	cp	BRD-A58157837	butabindide	Tripeptidyl peptidase inhibitor
2547	-6.59	cp	BRD-K19111024	clofibric-acid	PPAR receptor agonist
2568	-6.58	cp	BRD-K71799949	carbamazepine	Carboxamide antiepileptic
2584	-6.55	cp	BRD-K61691971	avrainvillamide-analog-1	nucleophosmin inhibitor
2600	-6.55	cp	BRD-K07117950	imperatorin	CDK inhibitor
2604	-6.51	cp	BRD-K87049188	fusaric-acid	Dopamine beta hydroxylase inhibitor
2605	-6.49	cp	BRD-K19540840	saracatinib	SRC inhibitor
2606	-6.47	cp	BRD-K25875056	SC-9	Protein tyrosine kinase activator
2607	-6.27	cp	BRD-K00206590	P-1075	ATP channel activator
2608	-6.25	cp	BRD-K69556541	ryanodine	Calcium channel blocker
2616	-6.21	cp	BRD-A33833419	TER-14687	Inhibitor of translocation of PKCq in T cells
2618	-6.21	cp	BRD-K82484965	carmoxirole	Dopamine receptor agonist
2625	-6.06	cp	BRD-K79930101	GW-583340	EGFR inhibitor
2632	-6.05	cp	BRD-K91696562	orantinib	FGFR inhibitor
2634	-6.03	cp	BRD-K33453211	levocabastine	Histamine receptor antagonist
2635	-5.99	cp	BRD-K85603128	resorcinol	Phosphodiesterase inhibitor
2638	-5.99	cp	BRD-K47659338	EMD-386088	Serotonin receptor agonist
2644	-5.99	cp	BRD-K32836707	CAY-10577	Casein kinase inhibitor
2653	-5.95	cp	BRD-K90382497	GW-843682X	PLK inhibitor
2654	-5.88	cp	BRD-K51541829	RO-25-6981	Ionotropic glutamate receptor antagonist
2662	-5.79	cp	BRD-A43849199	karakoline	Phytotoxin
2663	-5.78	cp	BRD-A07440155	labetalol	Adrenergic receptor antagonist
2667	-5.76	cp	BRD-A74907996	equol	Estrogen receptor agonist
2671	-5.74	cp	BRD-K68332390	ponalrestat	Aldose reductase inhibitor
2676	-5.74	cp	BRD-K59184148	SB-216763	Glycogen synthase kinase inhibitor
2678	-5.71	cp	BRD-K55591206	epigallocatechin	Nitric oxide synthase inhibitor
2685	-5.69	cp	BRD-A37776212	ICI-204448	Opioid receptor agonist
2689	-5.64	cp	BRD-K43887077	dopamine	Dopamine receptor agonist
2690	-5.6	cp	BRD-K59773493	benzohydroxamic-acid	Antifungal
2703	-5.6	cp	BRD-K49865102	PD-0325901	MEK inhibitor
2706	-5.58	cp	BRD-K61480498	epoxycholesterol	LXR agonist
2709	-5.57	cp	BRD-A74667430	etodolac	Cyclooxygenase inhibitor
2716	-5.53	cp	BRD-K73978287	hydrocortisone	Glucocorticoid receptor agonist
2717	-5.52	cp	BRD-A16444946	acarbose	Glucosidase inhibitor
2722	-5.52	cp	BRD-K04877770	FTase-inhibitor-B581	Farnesyltransferase inhibitor
2726	-5.47	cp	BRD-K40887525	ritanserin	Serotonin receptor antagonist
2728	-5.43	cp	BRD-K28428262	brivanib	FGFR inhibitor
2732	-5.43	cp	BRD-K97181089	amiloride	Sodium channel blocker
2741	-5.39	cp	BRD-K64157027	ZD-2079	Adrenergic receptor agonist
2743	-5.35	cp	BRD-K91336023	mesulergine	Dopamine receptor agonist
2747	-5.33	cp	BRD-K96862998	pirfenidone	TGF beta receptor inhibitor
2751	-5.32	cp	BRD-A50684349	fenoldopam	Dopamine receptor agonist
2761	-5.32	cp	BRD-K74763371	bosentan	Endothelin receptor antagonist
2771	-5.26	cp	BRD-K14880289	GW-501516	PPAR receptor agonist
2773	-5.25	cp	BRD-A43974575	tranylcypromine	Monoamine oxidase inhibitor
2775	-5.25	cp	BRD-K31283835	tofacitinib	JAK inhibitor
2778	-5.14	cp	BRD-A29644307	nomifensine	Dopamine uptake inhibitor
2781	-5.13	cp	BRD-A45499626	UBP-302	Glutamate receptor antagonist
2787	-5.04	cp	BRD-A53131506	epitestosterone	Inactive testosterone analog
2788	-5	cp	BRD-K40758068	efavirenz	HIV protease inhibitor
2792	-5	cp	BRD-A18202423	CPCCOEt	Glutamate receptor antagonist
2793	-4.97	cp	BRD-K54416256	methimazole	Antithyroid
2795	-4.97	cp	BRD-A31521121	methocarbamol	Muscle relaxant
2800	-4.91	cp	BRD-A28422058	L-689560	Glutamate receptor antagonist
2802	-4.9	cp	BRD-K29530284	amlexanox	Histamine receptor modulator
2803	-4.87	cp	BRD-K50938287	sumatriptan	Serotonin receptor agonist
2806	-4.83	cp	BRD-K36927236	glibenclamide	Sulfonylurea
2807	-4.82	cp	BRD-K74913225	brinzolamide	Carbonic anhydrase inhibitor
2808	-4.79	cp	BRD-K61192372	capecitabine	DNA synthesis inhibitor
2810	-4.78	cp	BRD-K76810206	nicergoline	Adrenergic receptor antagonist
2814	-4.77	cp	BRD-A56012032	thiorphan	Membrane metalloendopeptidase inhibitor
2820	-4.77	cp	BRD-A15131297	benazepril	ACE inhibitor
2830	-4.76	cp	BRD-A57382968	piroxicam	Cyclooxygenase inhibitor
2833	-4.76	cp	BRD-K68507560	dicycloverine	Acetylcholine receptor antagonist
2834	-4.71	cp	BRD-K56558538	ambroxol	Sodium channel blocker
2836	-4.66	cp	BRD-K77133231	PD-169316	p38 MAPK inhibitor
2839	-4.66	cp	BRD-A97479839	piperidolate	Acetylcholine receptor antagonist
2840	-4.65	cp	BRD-K59256312	gabexate	Serine protease inhibitor
2841	-4.62	cp	BRD-K41170226	deoxycholic-acid	G protein-coupled receptor agonist
2842	-4.62	cp	BRD-K62056274	quipazine	Serotonin receptor agonist
2849	-4.56	cp	BRD-K33211335	dextromethorphan	Glutamate receptor antagonist
2850	-4.54	cp	BRD-K82143716	flucytosine	Antifungal
2852	-4.52	cp	BRD-K67439147	SIB-1893	Glutamate receptor antagonist
2854	-4.51	cp	BRD-K28453807	nitrocaramiphen	Cholinergic receptor antagonist
2856	-4.51	cp	BRD-K08973992	linoleic-acid	Oxidative stress inducer
2858	-4.51	cp	BRD-A68039575	liquiritigenin	Aromatase inhibitor
2859	-4.5	cp	BRD-K15601958	SEW-2871	Lysophospholipid receptor agonist
2860	-4.5	cp	BRD-K33860217	CP-94253	Serotonin receptor agonist
2861	-4.49	cp	BRD-K99595596	salsolinol	Monoamine oxidase inhibitor
2869	-4.47	cp	BRD-K61177364	NBI-27914	CRF receptor antagonist
2871	-4.39	cp	BRD-K10136726	tosyllysyl-chloromethyl-ketone	Chymotrypsin inhibitor
2872	-4.33	cp	BRD-A84327315	calcitriol	Vitamin D receptor agonist
2873	-4.33	cp	BRD-K95739795	tetrabenazine	Vesicular monoamine transporter inhibitor
2874	-4.33	cp	BRD-K66615216	moxifloxacin	Bacterial DNA gyrase inhibitor
2879	-4.3	cp	BRD-K79437791	acetyl-farnesyl-cysteine	Inhibitor of methylation of endogenous isoprenylated proteins
2881	-4.26	cp	BRD-K21971034	OM-137	Aurora kinase inhibitor
2882	-4.23	cp	BRD-K11399644	phenformin	AMPK activator
2886	-4.21	cp	BRD-K35498378	alrestatin	Aldose reductase inhibitor
2901	-4.19	cp	BRD-K36862742	hydroflumethiazide	Sodium/potassium/chloride transporter inhibitor
2904	-4.16	cp	BRD-K23623876	decafluorobutane	Contrast agent
2908	-4.16	cp	BRD-K46766488	S-14506	Serotonin receptor agonist
2915	-4.12	cp	BRD-A73581086	ergometrine	Adrenergic receptor agonist
2918	-4.12	cp	BRD-A19736161	ondansetron	Serotonin receptor antagonist
2925	-4.04	cp	BRD-K03384561	roquinimex	Angiogenesis inhibitor
2928	-4.03	cp	BRD-K52219182	BRD-K52219182	Phosphodiesterase inhibitor
2937	-4.02	cp	BRD-A39747742	estradiol-valerate	Estrogen receptor agonist
2939	-4.02	cp	BRD-A62184259	cycloheximide	Protein synthesis inhibitor
2943	-4	cp	BRD-K43149758	myricetin	Androgen receptor agonist
2948	-3.95	cp	BRD-A02990301	lofexidine	Adrenergic receptor agonist
2952	-3.91	cp	BRD-K34508425	KUC103898N	-666
2955	-3.91	cp	BRD-K70301876	escitalopram	Selective serotonin reuptake inhibitor (SSRI)
2958	-3.91	cp	BRD-K55991774	BAS-09104376	HIV integrase inhibitor
2962	-3.88	cp	BRD-K02607075	tubocurarine	Acetylcholine receptor antagonist
2965	-3.85	cp	BRD-K16508793	diazepam	Benzodiazepine receptor agonist
2966	-3.84	cp	BRD-A47706533	L-BSO	Glutathione transferase inhibitor
2967	-3.84	cp	BRD-K30020243	aliskiren	Antihypertensive
2969	-3.81	cp	BRD-K93433262	alfacalcidol	Vitamin D receptor agonist
2972	-3.8	cp	BRD-A36217750	sulfinpyrazone	Uricosuric blocker
2978	-3.75	cp	BRD-A53952395	prilocaine	Local anesthetic
2979	-3.74	cp	BRD-K34608650	BRD-K34608650	Cannabinoid receptor agonist
2982	-3.74	cp	BRD-K62310379	fluticasone	Glucocorticoid receptor agonist
2989	-3.74	cp	BRD-A04668240	CGP-52432	GABA receptor antagonist
2991	-3.72	cp	BRD-K28120222	parthenolide	NFkB pathway inhibitor
2992	-3.7	cp	BRD-A17428743	BW-723C86	Serotonin receptor agonist
2994	-3.66	cp	BRD-K30697463	desoximetasone	Glucocorticoid receptor agonist
2995	-3.63	cp	BRD-K78280988	anandamide	Cannabinoid receptor agonist
2998	-3.61	cp	BRD-A30590053	MR-16728	Acetylcholine release enhancer
3000	-3.61	cp	BRD-A77722753	hydralazine	Vasodilator
3001	-3.6	cp	BRD-K62200014	anagrelide	Phosphodiesterase inhibitor
3003	-3.59	cp	BRD-K11540476	EMF-BCA1-64	Caspase inhibitor
3007	-3.59	cp	BRD-K96119599	leucodin	Melanin inhibitor
3020	-3.59	cp	BRD-A83937277	mephenytoin	Hydantoin antiepileptic
3021	-3.55	cp	BRD-K83010055	VU-0415374-1	Glutamate receptor modulator
3022	-3.54	cp	BRD-A77291778	cyclopentolate	Acetylcholine receptor antagonist
3024	-3.53	cp	BRD-K82941592	rosuvastatin	HMGCR inhibitor
3027	-3.52	cp	BRD-K28578425	cilostamide	Phosphodiesterase inhibitor
3028	-3.52	cp	BRD-A61470182	n-formylmethionylalanine	macrophage activator
3031	-3.52	cp	BRD-A26384407	chlortalidone	Carbonic anhydrase inhibitor
3036	-3.49	cp	BRD-K14536225	piceid	Glucosidase inhibitor
3041	-3.44	cp	BRD-K28912512	nicotinamide	Protein synthesis stimulant
3051	-3.42	cp	BRD-K22828899	TUL-XXI039	Serine/threonine kinase inhibitor
3052	-3.41	cp	BRD-K11717138	benzbromarone	Chloride channel blocker
3057	-3.4	cp	BRD-K50398167	meclofenamic-acid	Cyclooxygenase inhibitor
3060	-3.39	cp	BRD-K80738081	resveratrol	Cytochrome P450 inhibitor
3066	-3.38	cp	BRD-K04111260	raclopride	Dopamine receptor antagonist
3068	-3.35	cp	BRD-K42098891	protriptyline	Tricyclic antidepressant
3069	-3.28	cp	BRD-K75181824	acetyl-geranygeranyl-cysteine	Inhibitor of methyl esterification of geranylgeranylated proteins
3075	-3.28	cp	BRD-K88611939	aniracetam	Glutamate receptor agonist
3084	-3.27	cp	BRD-M47937986	cefatrizine	Bacterial cell wall synthesis inhibitor
3088	-3.21	cp	BRD-K87048468	RS-102221	Serotonin receptor antagonist
3090	-3.2	cp	BRD-K76205745	losartan	Angiotensin receptor antagonist
3093	-3.16	cp	BRD-K51805276	temefos	Cholinesterase inhibitor
3094	-3.14	cp	BRD-A83431637	resmethrin	Cytochrome P450 inhibitor
3096	-3.1	cp	BRD-A07395371	esmolol	Adrenergic receptor antagonist
3098	-3.07	cp	BRD-A28318179	aminomethyltransferase	Nitric oxide synthase inhibitor
3099	-3.07	cp	BRD-K57222227	indometacin	Cyclooxygenase inhibitor
3100	-3.07	cp	BRD-K66093087	FGIN-1-43	Benzodiazepine receptor agonist
3102	-3.04	cp	BRD-K64610608	EMF-bca1-57	caspase inhibitor
3105	-3	cp	BRD-K91243525	SR-142948	Neurotensin receptor antagonist
3106	-2.92	cp	BRD-K57718010	pentylenetetrazol	GABA receptor antagonist
3107	-2.9	cp	BRD-A49225603	alimemazine	Histamine receptor agonist
3108	-2.89	cp	BRD-K00184207	GR-206	Aryl hydrocarbon receptor ligand
3111	-2.89	cp	BRD-K28029915	dolasetron	Serotonin receptor antagonist
3113	-2.86	cp	BRD-K46211610	tolazoline	Adrenergic receptor antagonist
3114	-2.85	cp	BRD-K26015241	ODQ	Guanylyl cyclase inhibitor
3116	-2.85	cp	BRD-K52459643	prostaglandin-e1	Prostanoid receptor agonist
3119	-2.85	cp	BRD-K65417056	meprylcaine	Local anesthetic
3120	-2.82	cp	BRD-K72222507	quinapril	ACE inhibitor
3131	-2.72	cp	BRD-K59570838	homoveratrylamine	Dopamine analog
3133	-2.71	cp	BRD-K18250272	propoxycaine	Local anesthetic
3136	-2.64	cp	BRD-A42759514	ornidazole	Antiprotozoal
3139	-2.63	cp	BRD-A31195449	TCB2	Serotonin receptor agonist
3141	-2.61	cp	BRD-K81876028	CP-93129	Serotonin receptor agonist
3143	-2.56	cp	BRD-A55369275	CGP-54626	GABA receptor antagonist
3148	-2.54	cp	BRD-K19309090	SR-95639A	Acetylcholine receptor agonist
3150	-2.54	cp	BRD-K17008822	BD-1008	Sigma receptor antagonist
3153	-2.53	cp	BRD-K51662849	ilomastat	Matrix metalloprotease inhibitor
3155	-2.51	cp	BRD-A43930669	L-368899	Oxytocin receptor antagonist
3156	-2.5	cp	BRD-K01663662	diphenidol	Acetylcholine receptor agonist
3158	-2.47	cp	BRD-K87142802	veliparib	PARP inhibitor
3159	-2.42	cp	BRD-K25741894	skimmianine	Acetylcholinesterase inhibitor
3165	-2.41	cp	BRD-K95899059	LY-344864	Serotonin receptor agonist
3167	-2.4	cp	BRD-K37516142	idebenone	Calcium channel modulator
3172	-2.4	cp	BRD-K36638830	anabasine	Acetylcholine receptor agonist
3181	-2.37	cp	BRD-K28346421	rifapentine	RNA polymerase inhibitor
3194	-2.36	cp	BRD-K92446736	zatebradine	HCN channel blocker
3196	-2.36	cp	BRD-K11107424	tiotidine	Histamine receptor antagonist
3197	-2.36	cp	BRD-A75478957	PD-166793	Metalloproteinase inhibitor
3202	-2.33	cp	BRD-K73391359	quinisocaine	Local anesthetic
3205	-2.32	cp	BRD-K47679368	bromfenac	Cyclooxygenase inhibitor
3209	-2.29	cp	BRD-A22256192	terazosin	Adrenergic receptor antagonist
3218	-2.29	cp	BRD-K59331372	SB-366791	TRPV antagonist
3220	-2.29	cp	BRD-A53576514	orphenadrine	Acetylcholine receptor antagonist
3236	-2.29	cp	BRD-K08287586	butylparaben	DNA synthesis inhibitor
3242	-2.27	cp	BRD-K83023055	GR-135531	Melatonin receptor agonist
3243	-2.27	cp	BRD-A98299281	velnacrine	cholinesterase inhibitor
3261	-2.26	cp	BRD-K81783531	VX-222	HCV inhibitor
3262	-2.26	cp	BRD-K06980535	promazine	Dopamine receptor antagonist
3268	-2.24	cp	BRD-K82688027	RG-13022	PDGFR receptor inhibitor
3278	-2.23	cp	BRD-A02180903	betamethasone	Glucocorticoid receptor agonist
3282	-2.22	cp	BRD-K96134740	kitasamycin	Protein synthesis inhibitor
3284	-2.22	cp	BRD-K26373640	IKK-2-inhibitor	IKK inhibitor
3285	-2.22	cp	BRD-K19352500	prochlorperazine	Dopamine receptor antagonist
3296	-2.22	cp	BRD-A01826957	xanthinol	Vasodilator
3301	-2.18	cp	BRD-K71731651	PNU-120596	Acetylcholine receptor agonist
3304	-2.15	cp	BRD-A03623303	metoprolol	Adrenergic receptor antagonist
3305	-2.15	cp	BRD-K62929068	6-benzylaminopurine	Purinergic receptor activator
3311	-2.15	cp	BRD-K93461745	buspirone	Serotonin receptor agonist
3312	-2.13	cp	BRD-K53972329	ruxolitinib	JAK inhibitor
3313	-2.11	cp	BRD-A31159102	fluoxetine	Selective serotonin reuptake inhibitor (SSRI)
3325	-2.11	cp	BRD-K93280214	gabazine	GABA receptor antagonist
3330	-2.08	cp	BRD-K23335153	AMN-082	Glutamate receptor modulator
3333	-2.08	cp	BRD-A45664787	iloprost	Platelet aggregation inhibitor
3335	-2.05	cp	BRD-A15530910	carpindolol	Adrenergic receptor antagonist
3340	-2.04	cp	BRD-K14807180	SB-221284	Serotonin receptor antagonist
3344	-2.04	cp	BRD-K99107520	felbamate	Glutamate receptor antagonist
3345	-2.04	cp	BRD-K41895714	AS-605240	PI3K inhibitor
3347	-2.01	cp	BRD-K05977823	tenovins	SIRT inhibitor
3354	-1.99	cp	BRD-K94920105	DR-2313	PARP inhibitor
3359	-1.97	cp	BRD-K42221274	NNC-711	GAT inhibitor
3363	-1.97	cp	BRD-A99177642	deltaline	Acetylcholine receptor antagonist
3364	-1.97	cp	BRD-A73368467	fexofenadine	Histamine receptor antagonist
3366	-1.95	cp	BRD-K73838513	cinacalcet	Calcium channel activator
3368	-1.95	cp	BRD-K57930253	nitrazepam	Benzodiazepine receptor agonist
3374	-1.94	cp	BRD-K87226815	cycloserine	Bacterial cell wall synthesis inhibitor
3376	-1.9	cp	BRD-K30743633	TCPOBOP	CAR agonist
3380	-1.87	cp	BRD-A25234499	aminoglutethimide	Glucocorticoid receptor antagonist
3381	-1.83	cp	BRD-K53979406	ALX-5407	Glycine transporter inhibitor
3383	-1.83	cp	BRD-K63979671	etifenin	Compound used in hepatobiliary scans of the liver
3388	-1.8	cp	BRD-A49906757	scopolamine	Acetylcholine receptor antagonist
3393	-1.8	cp	BRD-K78633253	EXO-1	ARF inhibitor
3394	-1.8	cp	BRD-A27143604	DPN	Estrogen receptor agonist
3395	-1.76	cp	BRD-K92678294	irilin-a	Isoflavone
3398	-1.76	cp	BRD-A11135865	nor-binaltorphimine	Opioid receptor antagonist
3401	-1.76	cp	BRD-K74501079	azithromycin	Bacterial 50S ribosomal subunit inhibitor
3404	-1.76	cp	BRD-A30205217	ethotoin	Hydantoin antiepileptic
3405	-1.69	cp	BRD-K89162000	tandutinib	FLT3 inhibitor
3413	-1.66	cp	BRD-K32710582	EI-247	IGF-1 inhibitor
3417	-1.66	cp	BRD-K62996583	lidoflazine	Calcium channel blocker
3420	-1.63	cp	BRD-A33711280	metixene	Acetylcholine receptor antagonist
3428	-1.62	cp	BRD-K64402243	ivachtin	Caspase inhibitor
3429	-1.62	cp	BRD-K44067360	flufenamic-acid	Chloride channel blocker
3430	-1.62	cp	BRD-K38003476	clocortolone	Glucocorticoid receptor agonist
3434	-1.62	cp	BRD-K67847053	guanabenz	Adrenergic receptor agonist
3435	-1.61	cp	BRD-K73824630	skatole	Thrombin inhibitor
3437	-1.59	cp	BRD-K65639003	icariin	Phosphodiesterase inhibitor
3439	-1.59	cp	BRD-K93880783	stavudine	DNA directed DNA polymerase inhibitor
3440	-1.59	cp	BRD-K08589866	linsitinib	IGF-1 inhibitor
3444	-1.57	cp	BRD-K53123955	niridazole	Phosphofructokinase inhibitor
3447	-1.54	cp	BRD-K40742111	baeomycesic-acid	Lipoxygenase inhibitor
3448	-1.52	cp	BRD-A52172093	VU-0413807-2	Calcium channel blocker
3454	-1.52	cp	BRD-K45861246	azaperone	Dopamine receptor antagonist
3455	-1.51	cp	BRD-K30867024	SB-216641	Serotonin receptor antagonist
3456	-1.48	cp	BRD-K04833372	GSK-1904529A	IGF-1 inhibitor
3458	-1.48	cp	BRD-A84702196	penicillin	Bacterial cell wall synthesis inhibitor
3469	-1.48	cp	BRD-K24240364	GYKI-52466	Glutamate receptor antagonist
3470	-1.48	cp	BRD-K31987754	oleylethanolamide	Cannabinoid receptor agonist
3473	-1.46	cp	BRD-A53077924	tianeptine	Selective serotonin reuptake enhancer (SSRE)
3475	-1.44	cp	BRD-K64994968	progesterone	Progesterone receptor agonist
3478	-1.43	cp	BRD-K01555864	dibenzoylmethane	Antineoplastic
3481	-1.37	cp	BRD-A83237092	fulvestrant	Estrogen receptor antagonist
3483	-1.37	cp	BRD-A52588987	SKF-83566	Dopamine receptor antagonist
3486	-1.36	cp	BRD-K15791587	L-733060	Tachykinin antagonist
3491	-1.34	cp	BRD-A04327189	synephrine	Adrenergic receptor agonist
3494	-1.34	cp	BRD-A21723284	naltriben	Opioid receptor antagonist
3495	-1.34	cp	BRD-A66199457	asiaticoside	Antineoplastic
3496	-1.3	cp	BRD-K63874012	thioperamide	Histamine receptor antagonist
3497	-1.3	cp	BRD-A07000685	hydrocortisone	Glucocorticoid receptor agonist
3498	-1.27	cp	BRD-K99174507	cardiogenol-c	Cardiomyogenesis inducer
3501	-1.27	cp	BRD-K99922388	DPO-1	Potassium channel blocker
3502	-1.24	cp	BRD-K59753975	vindesine	Tubulin inhibitor
3507	-1.23	cp	BRD-A25569250	KI-16425	Lysophosphatidic acid receptor antagonist
3508	-1.23	cp	BRD-K00959089	thenoyltrifluoroacetone	Chelating agent
3511	-1.23	cp	BRD-K82823076	RO-15-4513	GABA benzodiazepine site receptor inverse agonist
3512	-1.23	cp	BRD-K56047318	RHC-80267	Triacylglycerol lipase inhibitor
3515	-1.23	cp	BRD-A59303141	quinethazone	Thiazide diuretic
3518	-1.2	cp	BRD-K47936004	piribedil	Dopamine receptor agonist
3520	-1.16	cp	BRD-K37814297	acepromazine	Dopamine receptor antagonist
3521	-1.16	cp	BRD-K89125793	tinidazole	Antiprotozoal
3524	-1.16	cp	BRD-K16444452	ibudilast	Leukotriene receptor antagonist
3525	-1.16	cp	BRD-A24429032	HEAT	Adrenergic receptor antagonist
3526	-1.16	cp	BRD-K06895174	cisapride	Serotonin receptor agonist
3528	-1.13	cp	BRD-A46186775	hydrocortisone	Glucocorticoid receptor agonist
3530	-1.13	cp	BRD-A90131694	alclometasone	Glucocorticoid receptor agonist
3535	-1.09	cp	BRD-K96670504	lonidamine	Glucokinase inhibitor
3537	-1.09	cp	BRD-K59753853	MDL-29951	Glutamate receptor antagonist
3542	-1.06	cp	BRD-A87479750	tenidap	Cyclooxygenase inhibitor
3543	-1.06	cp	BRD-K24675965	LY-288513	CCK receptor antagonist
3545	-1.06	cp	BRD-K54210043	NS-1619	Calcium channel activator
3551	-1.02	cp	BRD-A43882281	pinacidil	ATP channel activator
3552	-1.02	cp	BRD-K60060639	methyllidocaine	antiarrhythmic medication
3553	-1.02	cp	BRD-A45140972	meclocycline	Bacterial 30S ribosomal subunit inhibitor
3554	-1.02	cp	BRD-K82983861	GW-0742	PPAR receptor agonist
3555	-1.02	cp	BRD-K50422030	clomethiazole	GABA receptor antagonist
3556	-1.02	cp	BRD-K33583600	isoliquiritigenin	Guanylate cyclase activator
3558	-0.99	cp	BRD-K97118047	4,5,6,7-tetrabromobenzotriazole	Casein kinase inhibitor
3559	-0.99	cp	BRD-K63533170	AM-630	Cannabinoid receptor antagonist
3560	-0.99	cp	BRD-A95445494	maackiain	Sodium/glucose cotransporter inhibitor
3570	-0.99	cp	BRD-A02189320	met-leu-phe	-666
3572	-0.95	cp	BRD-K20995441	U-54494A	Opioid receptor agonist
3575	-0.95	cp	BRD-K47631482	bromhexine	Mucolytic agent
3582	-0.93	cp	BRD-K64755930	etazolate	Phosphodiesterase inhibitor
3584	-0.92	cp	BRD-A41941932	vitexin	Antioxidant
3593	-0.92	cp	BRD-K14767410	SC-560	Cyclooxygenase inhibitor
3595	-0.92	cp	BRD-K18316707	O-1918	Cannabinoid receptor antagonist
3597	-0.92	cp	BRD-K68264559	brimonidine	Adrenergic receptor agonist
3598	-0.88	cp	BRD-A75455249	kavain	Calcium channel modulator
3611	-0.88	cp	BRD-K00610438	altanserin	Serotonin receptor antagonist
3613	-0.88	cp	BRD-A33084410	5'-guanidinonaltrindole	Opioid receptor antagonist
3615	-0.88	cp	BRD-K20655524	mefexamide	Psychoactive drug
3619	-0.88	cp	BRD-A09472452	flecainide	Sodium channel blocker
3622	-0.85	cp	BRD-K71430621	clobenpropit	Histamine receptor antagonist
3623	-0.81	cp	BRD-K21733600	rofecoxib	Cyclooxygenase inhibitor
3625	-0.78	cp	BRD-A39230911	chlorphensin	Muscle relaxant
3626	-0.78	cp	BRD-A37837077	cyclazosin	Adrenergic receptor antagonist
3628	-0.78	cp	BRD-K98530306	clonidine	Adrenergic receptor agonist
3631	-0.74	cp	BRD-K21450440	benzthiazide	Carbonic anhydrase inhibitor
3633	-0.74	cp	BRD-A07780951	orciprenaline	Adrenergic receptor agonist
3638	-0.7	cp	BRD-K73999723	telmisartan	Angiotensin receptor antagonist
3640	-0.7	cp	BRD-K41713976	E-4031	Potassium channel blocker
3646	-0.67	cp	BRD-K68437527	EMF-bca1-60	caspase inhibitor
3652	-0.67	cp	BRD-K41868777	W-5	Calmodulin antagonist
3655	-0.67	cp	BRD-K47192521	icosapent	Platelet aggregation inhibitor
3656	-0.63	cp	BRD-K79877282	PF-543	Sphingosine kinase inhibitor
3660	-0.6	cp	BRD-K25311561	KU-55933	ATM kinase inhibitor
3662	-0.59	cp	BRD-K54314721	zolmitriptan	Serotonin receptor agonist
3671	-0.56	cp	BRD-K80315159	DPPE	Histamine receptor antagonist
3682	-0.56	cp	BRD-K54704028	BAY-36-7620	Glutamate receptor antagonist
3684	-0.56	cp	BRD-K68867920	quetiapine	Dopamine receptor antagonist
3687	-0.56	cp	BRD-K63828191	raloxifene	Estrogen receptor antagonist
3688	-0.53	cp	BRD-K09778810	FGIN-1-27	Inositol monophosphatase inhibitor
3690	-0.49	cp	BRD-K02581333	protein-tyrosine-phosphatase-inhibitor-IV	Tyrosine phosphatase inhibitor
3691	-0.49	cp	BRD-A95939040	sertaconazole	Sterol demethylase inhibitor
3696	-0.46	cp	BRD-A25143711	hydrocortisone	Glucocorticoid receptor agonist
3699	-0.46	cp	BRD-A24514565	warfarin	Vitamin K antagonist
3701	-0.42	cp	BRD-A95696066	nisoxetine	Norepinephrine reuptake inhibitor
3702	-0.42	cp	BRD-K04185004	oxybuprocaine	Local anesthetic
3703	-0.42	cp	BRD-K10974103	diloxanide	Protein synthesis inhibitor
3712	-0.42	cp	BRD-K55344148	BU-224	Imidazoline receptor ligand
3716	-0.39	cp	BRD-K13032584	procarbazine	Monoamine oxidase inhibitor
3717	-0.39	cp	BRD-A47598013	citalopram	Serotonin reuptake inhibitor
3718	-0.32	cp	BRD-A92585442	RU-28318	Cytochrome P450 inhibitor
3720	-0.28	cp	BRD-M00539986	formoterol	Adrenergic receptor agonist
3723	-0.28	cp	BRD-K96799727	pifithrin-mu	HSP inhibitor
3725	-0.28	cp	BRD-K49945136	GR-113808	Serotonin receptor antagonist
3728	-0.14	cp	BRD-K45033733	famciclovir	DNA polymerase inhibitor
3731	-0.14	cp	BRD-A95869247	indapamide	Thiazide diuretic
3735	-0.11	cp	BRD-K50859149	sulfafurazole	Bacterial antifolate
3738	-0.07	cp	BRD-A67862938	naftidrofuryl	Adrenergic receptor antagonist
3740	-0.02	cp	BRD-A90799790	isradipine	Calcium channel blocker
3742	0	cp	BRD-K86873305	piperacillin	Bacterial cell wall synthesis inhibitor
3745	0	cp	BRD-K13356952	methazolamide	Carbonic anhydrase inhibitor
3748	0	cp	BRD-K90864987	cobalt(II)-chloride	HSP inducer
3751	0	cp	BRD-K31491153	1-phenylbiguanide	Serotonin receptor agonist
3755	0	cp	BRD-K74514084	pazopanib	KIT inhibitor
3756	0	cp	BRD-K09436313	prostaglandin	Prostanoid receptor antagonist
3757	0	cp	BRD-K82091397	SB-239063	p38 MAPK inhibitor
3758	0	cp	BRD-K67506692	tyrphostin-AG-126	ERK1 and ERK2 phosphorylation inhibitor
3767	0	cp	BRD-K35128472	2-aminopurine	Serine/threonine kinase inhibitor
3768	0	cp	BRD-K18135438	chenodeoxycholic-acid	11-beta-HSD1 inhibitor
3775	0	cp	BRD-K13927029	retinol	Retinoid receptor ligand
3777	0	cp	BRD-K01436366	XMD-1150	Leucine rich repeat kinase inhibitor
3778	0	cp	BRD-K04412738	tramadol	Norepinephrine reuptake inhibitor
3783	0	cp	BRD-K13664374	dichloroacetic-acid	Pyruvate dehydrogenase kinase inhibitor
3790	0	cp	BRD-K52735702	cefdinir	Bacterial cell wall synthesis inhibitor
3793	0	cp	BRD-M07438658	lapatinib	EGFR inhibitor
3797	0	cp	BRD-A77050075	heraclenol	Vitamin K antagonist
3805	0	cp	BRD-A67438293	treprostinil	Prostacyclin analog
3820	0	cp	BRD-K64835161	BRD-K64835161	-666
3821	0	cp	BRD-A96255180	ribavirin	Antiviral
3822	0	cp	BRD-K40213712	SAL-1	Adenosine receptor antagonist
3823	0	cp	BRD-K02526760	QS-11	ARFGAP inhibitor
3830	0	cp	BRD-K94176593	TWS-119	Glycogen synthase kinase inhibitor
3831	0	cp	BRD-A24122750	saclofen	GABA receptor antagonist
3833	0	cp	BRD-K94270326	ecopipam	Dopamine receptor antagonist
3838	0	cp	BRD-K24201553	SB-269970	Serotonin receptor antagonist
3840	0	cp	BRD-K26521938	dinoprostone	Prostanoid receptor agonist
3843	0	cp	BRD-A32949107	MRS-1845	Calcium channel blocker
3845	0	cp	BRD-A20126139	medrysone	Glucocorticoid receptor agonist
3855	0	cp	BRD-A59215453	lobelanidine	Acetylcholine receptor antagonist
3864	0	cp	BRD-K93332168	isocarboxazid	Monoamine oxidase inhibitor
3872	0	cp	BRD-A49765801	fludroxycortide	Glucocorticoid receptor agonist
3873	0	cp	BRD-A81866333	CGS-21680	Adenosine receptor agonist
3879	0	cp	BRD-K65786282	CGP-7930	GABA receptor modulator
3888	0	cp	BRD-K07507905	BRL-37344	Adrenergic receptor agonist
3891	0	cp	BRD-K87991767	umbelliferone	Cyclooxygenase inhibitor
3893	0	cp	BRD-K54411430	robustic-acid	cAMP inhibitor
3894	0	cp	BRD-K19554809	MK-212	Serotonin receptor agonist
3896	0	cp	BRD-K88849294	lobaric-acid	Tyrosine phosphatase inhibitor
3898	0	cp	BRD-K45330754	diethylstilbestrol	Estrogen receptor agonist
3899	0	cp	BRD-K68407802	KIN001-055	EGFR inhibitor
3905	0	cp	BRD-K92428232	GSK-461364	PLK inhibitor
3906	0	cp	BRD-K00627859	tubastatin-a	HDAC inhibitor
3909	0	cp	BRD-A31800922	procyclidine	Acetylcholine receptor antagonist
3911	0	cp	BRD-K72903603	zidovudine	Reverse transcriptase inhibitor
3912	0	cp	BRD-K57631554	aminolevulinic-acid	Oxidizing agent
3916	0	cp	BRD-K67102207	phenylbutyrate	HDAC inhibitor
3917	0	cp	BRD-K11433652	aspirin	Cyclooxygenase inhibitor
3918	0	cp	BRD-A65282128	cefazolin	Bacterial cell wall synthesis inhibitor
3921	0	cp	BRD-K57886322	fluocinonide	Glucocorticoid receptor agonist
3922	0	cp	BRD-K48168960	propylthiouracil	Thyroid peroxidase inhibitor
3923	0	cp	BRD-M40783228	mesna	Antioxidant
3927	0	cp	BRD-K71926323	marbofloxacin	Bacterial DNA gyrase inhibitor
3930	0	cp	BRD-K55301415	abiraterone	17,20 lyase inhibitor
3932	0	cp	BRD-A25576662	streptozotocin	DNA alkylating agent
3943	0	cp	BRD-K71512533	SNS-314	Aurora kinase inhibitor
3951	0	cp	BRD-K89732114	trifluoperazine	Dopamine receptor antagonist
3956	0.02	cp	BRD-K72703948	ZM-447439	Aurora kinase inhibitor
3957	0.06	cp	BRD-K52989797	clomipramine	Serotonin transporter inhibitor (SERT)
3961	0.07	cp	BRD-K55127134	fluphenazine	Dopamine receptor antagonist
3969	0.14	cp	BRD-A65671304	candesartan	Angiotensin receptor antagonist
3970	0.18	cp	BRD-K01095011	finasteride	5-alpha reductase inhibitor
3971	0.18	cp	BRD-A63043573	cabergoline	Dopamine receptor agonist
3972	0.18	cp	BRD-M45964048	verteporfin	Photosensitizing agent
3976	0.18	cp	BRD-A04756508	norgestimate	Progesterone receptor agonist
3977	0.18	cp	BRD-K33818169	GW-3965	LXR agonist
3978	0.21	cp	BRD-K88871508	lisuride	Dopamine receptor agonist
3979	0.21	cp	BRD-K54759182	dosulepin	Norepinephrine reuptake inhibitor
3980	0.21	cp	BRD-K76587808	fraxetin	Antioxidant
3984	0.21	cp	BRD-K92049597	triamterene	Sodium channel blocker
3985	0.22	cp	BRD-K83597974	pargyline	Monoamine oxidase inhibitor
3987	0.25	cp	BRD-A36318220	necrostatin-1	RIPK inhibitor
3988	0.28	cp	BRD-A97674275	ranolazine	Sodium channel blocker
3993	0.28	cp	BRD-A78391468	prednisolone	Glucocorticoid receptor agonist
4002	0.28	cp	BRD-K39915878	loxapine	Dopamine receptor antagonist
4006	0.28	cp	BRD-K29313308	HDAC3-selective	HDAC inhibitor
4007	0.28	cp	BRD-A51714012	venlafaxine	Adrenergic inhibitor
4009	0.31	cp	BRD-K22031190	diflunisal	Prostanoid receptor antagonist
4010	0.32	cp	BRD-K04046242	equilin	Estrogen receptor agonist
4011	0.32	cp	BRD-K75089421	procainamide	Sodium channel blocker
4012	0.35	cp	BRD-K95202259	ML-3163	p38 MAPK inhibitor
4013	0.35	cp	BRD-A15415227	GW-1929	PPAR receptor agonist
4022	0.35	cp	BRD-K12513978	fenbufen	Cyclooxygenase inhibitor
4023	0.39	cp	BRD-K17796732	JWH-015	Cannabinoid receptor agonist
4024	0.39	cp	BRD-K34170797	fexaramine	FXR agonist
4030	0.39	cp	BRD-K59273480	propentofylline	Adenosine reuptake inhibitor
4038	0.42	cp	BRD-K59332007	linopirdine	Potassium channel blocker
4042	0.42	cp	BRD-K29582677	flunarizine	Calcium channel blocker
4045	0.42	cp	BRD-A69917777	aminopentamide	Acetylcholine receptor antagonist
4048	0.42	cp	BRD-K61250553	loperamide	Opioid receptor agonist
4053	0.46	cp	BRD-K88560311	rucaparib	PARP inhibitor
4058	0.47	cp	BRD-K50387473	XMD-892	MAP kinase inhibitor
4063	0.49	cp	BRD-A23683907	NAS-181	Serotonin receptor antagonist
4064	0.49	cp	BRD-K00603606	ticlopidine	Purinergic receptor antagonist
4066	0.49	cp	BRD-K64614248	salicin	Anti-inflammatory
4073	0.49	cp	BRD-K02637541	celecoxib	Cyclooxygenase inhibitor
4074	0.53	cp	BRD-K03600606	catechin	Beta secretase inhibitor
4079	0.53	cp	BRD-K53523901	arctigenin	MEK inhibitor
4084	0.53	cp	BRD-K79602928	metformin	Insulin sensitizer
4085	0.6	cp	BRD-A56359832	zileuton	Leukotriene inhibitor
4086	0.6	cp	BRD-K22385716	LY-303511	Casein kinase inhibitor
4090	0.6	cp	BRD-A05352148	ipratropium	Acetylcholine receptor antagonist
4096	0.6	cp	BRD-A45543382	metrizamide	Radiopaque medium
4098	0.63	cp	BRD-A92177080	betamethasone	Glucocorticoid receptor agonist
4099	0.63	cp	BRD-K67043667	altretamine	DNA synthesis inhibitor
4101	0.64	cp	BRD-K80725632	lavendustin-c	EGFR inhibitor
4102	0.67	cp	BRD-K51476772	ST-638	Tyrosine kinase inhibitor
4103	0.67	cp	BRD-A41304429	practolol	Adrenergic receptor antagonist
4112	0.7	cp	BRD-K60923938	veratridine	Sodium channel activator
4115	0.7	cp	BRD-A42831637	tetrahydrocannabinol-7-oic-acid	Anti-inflammatory
4116	0.7	cp	BRD-A02713983	dihydrodeoxygedunin	Growth factor receptor activator
4117	0.7	cp	BRD-A33447119	oxfendazole	Anthelmintic
4121	0.74	cp	BRD-A95513702	androsta-1,4-dien-3,17-dione	Aromatase inhibitor
4139	0.74	cp	BRD-K84663978	trequinsin	Phosphodiesterase inhibitor
4140	0.74	cp	BRD-K71103788	duloxetine	Serotonin reuptake inhibitor
4143	0.76	cp	BRD-K37865504	LY-2183240	FAAH inhibitor
4148	0.78	cp	BRD-A19661776	mianserin	Serotonin receptor antagonist
4153	0.78	cp	BRD-A78322124	dobutamine	Adrenergic receptor agonist
4154	0.81	cp	BRD-K25186396	tangeritin	Cell cycle inhibitor
4155	0.81	cp	BRD-A80641450	FR-139317	Endothelin receptor antagonist
4156	0.81	cp	BRD-K39670393	amthamine	Histamine receptor agonist
4160	0.83	cp	BRD-A35519318	benidipine	Calcium channel blocker
4165	0.85	cp	BRD-A70449690	forskolin	Adenylyl cyclase activator
4166	0.85	cp	BRD-A31801025	formestane	Aromatase inhibitor
4169	0.85	cp	BRD-K16277217	piperacetazine	Dopamine receptor antagonist
4172	0.85	cp	BRD-K32645441	dipropyl-5ct	Serotonin receptor agonist
4181	0.85	cp	BRD-K03319035	maprotiline	Norepinephrine reuptake inhibitor
4183	0.88	cp	BRD-K20141153	atomoxetine	Norepinephrine transporter inhibitor
4184	0.88	cp	BRD-K14993104	bemegride	Chemoreceptor agonist
4185	0.92	cp	BRD-K07736136	VX-702	p38 MAPK inhibitor
4186	0.92	cp	BRD-K11696279	BU-239	Imidazoline receptor agonist
4191	0.92	cp	BRD-K74212935	ergocryptine	Dopamine agonist
4193	0.95	cp	BRD-K34441861	moexipril	ACE inhibitor
4195	0.95	cp	BRD-K15196155	IBC-293	Hydroxycarboxylic acid receptor agonist
4196	0.95	cp	BRD-K89210380	biotin	Vitamin B
4199	0.99	cp	BRD-K12932420	YM-976	Phosphodiesterase inhibitor
4200	0.99	cp	BRD-K65146499	nabumetone	Cyclooxygenase inhibitor
4201	0.99	cp	BRD-K50891186	GR-103691	Dopamine receptor antagonist
4202	0.99	cp	BRD-K97810537	beclometasone	Glucocorticoid receptor agonist
4203	0.99	cp	BRD-A97437073	rosiglitazone	Insulin sensitizer
4205	1.02	cp	BRD-K10466330	AVA	Nucleophosmin inhibitor
4208	1.02	cp	BRD-K87024524	phenelzine	Monoamine oxidase inhibitor
4214	1.02	cp	BRD-A21858158	praziquantel	Anthelmintic
4215	1.04	cp	BRD-A02710418	meptazinol	Opioid receptor agonist
4217	1.06	cp	BRD-K01253243	SB-590885	RAF inhibitor
4218	1.06	cp	BRD-A63836183	PD-123319	Angiotensin receptor antagonist
4221	1.06	cp	BRD-K28936863	ketotifen	Histamine receptor agonist
4228	1.06	cp	BRD-K49111258	prazosin	Adrenergic receptor antagonist
4231	1.09	cp	BRD-K52930707	rescinnamine	ACE inhibitor
4240	1.09	cp	BRD-K06854232	AM-580	Retinoid receptor agonist
4241	1.09	cp	BRD-A26711594	nicardipine	Calcium channel blocker
4243	1.09	cp	BRD-K97764662	PD-173074	FGFR inhibitor
4247	1.09	cp	BRD-K11129031	gemfibrozil	Lipoprotein lipase activator
4248	1.1	cp	BRD-K44094599	tacrolimus	Calcineurin inhibitor
4250	1.13	cp	BRD-K14681867	somatostatin	Somatostatin receptor agonist
4254	1.13	cp	BRD-K09635314	M-3M3FBS	phospholipase activator
4258	1.13	cp	BRD-K40901640	cinanserin	Serotonin receptor antagonist
4259	1.13	cp	BRD-K76723084	isotretinoin	Retinoid receptor agonist
4263	1.14	cp	BRD-A56892734	esomeprazole	ATPase inhibitor
4264	1.16	cp	BRD-A64227845	SKF-77434	Dopamine receptor agonist
4273	1.16	cp	BRD-K87696786	LY-456236	Glutamate receptor antagonist
4276	1.16	cp	BRD-A65449987	flunisolide	Cytochrome P450 inhibitor
4277	1.16	cp	BRD-K36377456	marmesin	Angiogenesis inhibitor
4278	1.16	cp	BRD-K89348303	ramipril	ACE inhibitor
4282	1.19	cp	BRD-K67277431	picotamide	Thromboxane receptor antagonist
4283	1.2	cp	BRD-K34415467	trimethobenzamide	Histamine receptor antagonist
4286	1.2	cp	BRD-A30655177	LFM-A13	BTK inhibitor
4291	1.2	cp	BRD-K15715913	fluperlapine	Serotonin receptor antagonist
4293	1.23	cp	BRD-A68281735	REV-5901	Leukotriene receptor antagonist
4294	1.25	cp	BRD-K47780086	penciclovir	DNA directed DNA polymerase inhibitor
4301	1.26	cp	BRD-A70514680	articaine	Local anesthetic
4305	1.27	cp	BRD-K52620403	STO-609	Calmodulin antagonist
4311	1.27	cp	BRD-K92723993	imatinib	BCR-ABL kinase inhibitor
4318	1.28	cp	BRD-A01593789	chlormadinone	5-alpha reductase inhibitor
4320	1.3	cp	BRD-K60640630	mometasone	Glucocorticoid receptor agonist
4322	1.3	cp	BRD-K09416995	lovastatin	HMGCR inhibitor
4326	1.3	cp	BRD-A31227688	kynuramine	Aryl hydrocarbon receptor activator
4329	1.3	cp	BRD-K89152108	liothyronine	Thyroid hormone stimulant
4336	1.3	cp	BRD-A66435872	HTMT	Histamine receptor agonist
4337	1.34	cp	BRD-A06726973	dibutyrylcyclic-gmp	cGMP analog
4342	1.34	cp	BRD-A34751532	homosalate	HSP inducer
4345	1.34	cp	BRD-K70330367	amantadine	Glutamate receptor antagonist
4349	1.34	cp	BRD-A10903566	imiloxan	Adrenergic receptor antagonist
4355	1.35	cp	BRD-A75769826	SDM25N	Opioid receptor antagonist
4356	1.37	cp	BRD-A84389633	tropanyl-3,5-dimethylbenzoate	Serotonin receptor antagonist
4358	1.37	cp	BRD-K43290182	Ro-04-6790	Serotonin receptor antagonist
4367	1.41	cp	BRD-K81855038	roxatidine	Histamine receptor antagonist
4373	1.41	cp	BRD-K63516691	T-0156	Phosphodiesterase inhibitor
4374	1.41	cp	BRD-K59369769	tozasertib	Aurora kinase inhibitor
4380	1.41	cp	BRD-K15502390	nevirapine	Reverse transcriptase inhibitor
4381	1.44	cp	BRD-M72442222	vicriviroc	CC chemokine receptor antagonist
4382	1.44	cp	BRD-K65331431	retinyl	vitamin analog
4383	1.48	cp	BRD-K52172416	anastrozole	Aromatase inhibitor
4384	1.48	cp	BRD-K18816859	L-694247	Serotonin receptor agonist
4391	1.5	cp	BRD-K79254416	decitabine	DNA methyltransferase inhibitor
4392	1.5	cp	BRD-K13211965	L-741742	Dopamine receptor antagonist
4400	1.52	cp	BRD-K25310650	ormetoprim	Bacterial antifolate
4401	1.52	cp	BRD-K91442916	CAM-9-026	Membrane metalloendopeptidase inhibitor
4405	1.52	cp	BRD-K10843433	phenylbutazone	Cyclooxygenase inhibitor
4414	1.52	cp	BRD-K02283807	GR-32191	Thromboxane receptor antagonist
4416	1.52	cp	BRD-K81729199	AQ-RA741	Acetylcholine receptor antagonist
4432	1.52	cp	BRD-K56509348	BMS-182874	Endothelin receptor antagonist
4434	1.52	cp	BRD-A16700644	isoxsuprine	Adrenergic receptor agonist
4436	1.53	cp	BRD-K62982419	cilomilast	Phosphodiesterase inhibitor
4439	1.54	cp	BRD-K53857191	risperidone	Dopamine receptor antagonist
4440	1.59	cp	BRD-A14208071	oxyphenonium	Cholinergic receptor antagonist
4441	1.59	cp	BRD-K92817986	BJM-CSC-19	MEK inhibitor
4442	1.59	cp	BRD-A49160188	donepezil	Acetylcholinesterase inhibitor
4443	1.62	cp	BRD-K10860596	granisetron	Serotonin receptor antagonist
4444	1.62	cp	BRD-A28856712	tetryzoline	Adrenergic receptor agonist
4445	1.62	cp	BRD-K37289225	clozapine	Dopamine receptor antagonist
4446	1.66	cp	BRD-K72541103	JAK3-inhibitor-I	JAK inhibitor
4447	1.66	cp	BRD-K08556791	ethoprop	Acetylcholinesterase inhibitor
4449	1.67	cp	BRD-A44090213	indoprofen	Cyclooxygenase inhibitor
4459	1.69	cp	BRD-A72441487	stiripentol	GABA uptake inhibitor
4461	1.69	cp	BRD-K60184833	tyrphostin-46	Tyrosine kinase inhibitor
4462	1.71	cp	BRD-K36864847	BD-1047	Adrenergic receptor antagonist
4464	1.72	cp	BRD-K85090592	pilocarpine	Acetylcholine receptor agonist
4467	1.73	cp	BRD-K06147391	telenzepine	Acetylcholine receptor antagonist
4468	1.73	cp	BRD-K81473089	tacrine	Acetylcholinesterase inhibitor
4469	1.75	cp	BRD-K13087974	4,5-dianilinophthalimide	EGFR inhibitor
4472	1.76	cp	BRD-K45296539	ZD-7114	Adrenergic receptor agonist
4477	1.8	cp	BRD-K76775527	nimesulide	Cyclooxygenase inhibitor
4478	1.83	cp	BRD-K98684188	GSK-0660	PPAR receptor antagonist
4491	1.83	cp	BRD-A38747044	KU-14R	Imidazoline receptor ligand
4500	1.83	cp	BRD-K21936341	oxotremorine	Acetylcholine receptor agonist
4501	1.85	cp	BRD-K95992530	Cyclo-[Arg-Gly-Asp-D-Phe-Val]	integrin antagonist
4503	1.86	cp	BRD-K58772419	AZD-6482	PI3K inhibitor
4505	1.86	cp	BRD-K02992638	lamivudine	Nucleoside reverse transcriptase inhibitor
4506	1.87	cp	BRD-K05804044	AZ-628	RAF inhibitor
4507	1.87	cp	BRD-K26674531	GR-235	Estrogen receptor agonist
4510	1.87	cp	BRD-A59174698	ritodrine	Adrenergic receptor agonist
4512	1.94	cp	BRD-K95763993	trapidil	PDGFR receptor inhibitor
4517	1.94	cp	BRD-A41250306	cyclopenthiazide	Thiazide diuretic
4524	1.94	cp	BRD-K96084870	DMBI	PDGFR receptor inhibitor
4525	1.94	cp	BRD-K81272440	dantrolene	Calcium channel blocker
4526	1.97	cp	BRD-K14965640	ibuprofen	Cyclooxygenase inhibitor
4529	1.97	cp	BRD-A02367930	ethinyl-estradiol	DNA directed DNA polymerase stimulant
4530	1.98	cp	BRD-K88789588	letrozole	Aromatase inhibitor
4531	2.01	cp	BRD-A54880345	etomidate	GABA receptor modulator
4533	2.03	cp	BRD-K26429091	J-104129	Acetylcholine receptor antagonist
4534	2.04	cp	BRD-K27721098	clopidogrel	Purinergic receptor antagonist
4535	2.06	cp	BRD-A39172021	ampiroxicam	Cyclooxygenase inhibitor
4536	2.07	cp	BRD-A96882008	L-732138	Tachykinin antagonist
4537	2.08	cp	BRD-A70731303	avrainvillamide-analog-5	nucleophosmin inhibitor
4538	2.08	cp	BRD-K28761384	zuclopenthixol	Dopamine receptor antagonist
4545	2.08	cp	BRD-A64479082	quinidine	Sodium channel blocker
4547	2.18	cp	BRD-A39522003	OMDM-2	FAAH inhibitor
4548	2.18	cp	BRD-K05181463	L-741626	Dopamine receptor antagonist
4554	2.18	cp	BRD-K14221570	benzopurpurin-4b	HIV entry inhibitor
4555	2.18	cp	BRD-A84481105	thioridazine	Dopamine receptor antagonist
4561	2.18	cp	BRD-K10995081	perphenazine	Dopamine receptor antagonist
4562	2.21	cp	BRD-A65145453	ATPA	Glutamate receptor agonist
4563	2.22	cp	BRD-A34817987	itraconazole	Cytochrome P450 inhibitor
4569	2.22	cp	BRD-K85871428	SC-68376	p38 MAPK inhibitor
4571	2.22	cp	BRD-K15025317	BAY-11-7821	NFkB pathway inhibitor
4574	2.22	cp	BRD-K15834839	lobendazole	Anthelmintic
4575	2.28	cp	BRD-K67783091	haloperidol	Dopamine receptor antagonist
4576	2.32	cp	BRD-K78278890	NM-PP1	Mutant kinase inhibitor
4586	2.33	cp	BRD-K48029790	OBAA	Phospholipase inhibitor
4605	2.33	cp	BRD-K37848908	ceforanide	Penicillin binding protein inhibitor
4606	2.36	cp	BRD-K05181084	NGB-2904	Dopamine receptor antagonist
4607	2.36	cp	BRD-A87606379	nadolol	Adrenergic receptor antagonist
4608	2.4	cp	BRD-A71262238	nafadotride	Dopamine receptor antagonist
4610	2.4	cp	BRD-A47144777	dihydro-7-desacetyldeoxygedunin	HSP inhibitor
4611	2.4	cp	BRD-K88742110	BRD-K88742110	HDAC inhibitor
4612	2.43	cp	BRD-K77175907	calcifediol	Vitamin D receptor agonist
4613	2.44	cp	BRD-A01320529	salmeterol	Adrenergic receptor agonist
4619	2.47	cp	BRD-K64310881	MW-STK33-3B	Potassium channel activator
4620	2.47	cp	BRD-K82577285	dipropyl-dopamine	Dopamine receptor agonist
4635	2.5	cp	BRD-K10177585	PSB-11	Adenosine receptor antagonist
4640	2.5	cp	BRD-A41833852	naloxone	Opioid receptor antagonist
4646	2.5	cp	BRD-K00675675	CL-82198	Metalloproteinase inhibitor
4647	2.5	cp	BRD-K71266197	PSB-06126	NTPDase inhibitor
4648	2.5	cp	BRD-K09497549	kawain	Calcium channel modulator
4657	2.5	cp	BRD-A80017228	bendroflumethiazide	Sodium/potassium/chloride transporter inhibitor
4659	2.5	cp	BRD-A70083328	secnidazole	Acetylcholinesterase inhibitor
4664	2.51	cp	BRD-A96456596	FPL-55712	Leukotriene receptor antagonist
4676	2.52	cp	BRD-A40639672	ketorolac	Cyclooxygenase inhibitor
4678	2.52	cp	BRD-A29485665	bicalutamide	Androgen receptor antagonist
4681	2.54	cp	BRD-K89055274	alverine	Muscle relaxant
4691	2.54	cp	BRD-A07765530	epinephrine	carbonic anhydrase activator
4692	2.55	cp	BRD-A63998256	helveticoside	ATPase inhibitor
4693	2.57	cp	BRD-K63550407	erythromycin	NFkB pathway inhibitor
4695	2.6	cp	BRD-K62736196	guanabenz	-666
4709	2.61	cp	BRD-K09638361	SA-63133	-666
4710	2.61	cp	BRD-A93000692	ciglitazone	PPAR receptor agonist
4711	2.61	cp	BRD-K18909381	CGS-12066B	Serotonin receptor agonist
4714	2.61	cp	BRD-K55044200	amoxicillin	Penicillin binding protein inhibitor
4715	2.64	cp	BRD-K44353683	nateglinide	Insulin secretagogue
4718	2.64	cp	BRD-K35483542	alitretinoin	Retinoid receptor agonist
4724	2.64	cp	BRD-A29260609	acebutolol	Adrenergic receptor antagonist
4725	2.68	cp	BRD-K28183345	proguanil	Dihydrofolate reductase inhibitor
4726	2.75	cp	BRD-K93918653	quizartinib	FLT3 inhibitor
4735	2.75	cp	BRD-A81233518	glycopyrrolate	Acetylcholine receptor antagonist
4739	2.77	cp	BRD-A62525898	prednisone	Glucocorticoid receptor agonist
4745	2.78	cp	BRD-K09963420	saquinavir	HIV protease inhibitor
4748	2.78	cp	BRD-A78877355	nefopam	Cyclooxygenase inhibitor
4749	2.78	cp	BRD-K68558722	deracoxib	Cyclooxygenase inhibitor
4750	2.79	cp	BRD-K36153907	KU-C103885	Cystic fibrosis transmembrane conductance regulator inhibitor
4752	2.8	cp	BRD-K79684402	RO-10-5824	Dopamine receptor agonist
4756	2.82	cp	BRD-A26334849	propafenone	Antiarrhythmic
4757	2.82	cp	BRD-A97739905	ketoprofen	Cyclooxygenase inhibitor
4765	2.87	cp	BRD-A24381660	zeranol	Estrogen receptor agonist
4766	2.88	cp	BRD-K86509404	iso-olomoucine	CDK inhibitor
4767	2.89	cp	BRD-K29359156	ebselen	H+/K+-ATPase inhibitor
4779	2.89	cp	BRD-K67445247	flurofamide	Urease inhibitor
4780	2.89	cp	BRD-K32526544	DCEBIO	Potassium channel activator
4786	2.89	cp	BRD-A29734509	disopyramide	Sodium channel blocker
4788	2.89	cp	BRD-K86600316	RS-79948	Adrenergic receptor antagonist
4789	2.89	cp	BRD-K02867583	minaprine	Serotonin reuptake inhibitor
4790	2.9	cp	BRD-K08996725	zolantidine	Histamine receptor antagonist
4793	2.9	cp	BRD-A72988804	tiaprofenic-acid	Cyclooxygenase inhibitor
4800	2.92	cp	BRD-A84134924	pancuronium	Acetylcholine receptor antagonist
4806	2.93	cp	BRD-M41783010	acamprosate	Glutamate receptor antagonist
4807	2.94	cp	BRD-A49172652	lansoprazole	ATPase inhibitor
4808	3.02	cp	BRD-K33459542	ditolylguanidine	Sigma receptor agonist
4809	3.03	cp	BRD-A63546914	RO-04-5595	Glutamate receptor antagonist
4810	3.07	cp	BRD-K50325075	UCL-2077	Slow after hyperpolarization channel blocker
4811	3.1	cp	BRD-K09397065	SR-57227A	Serotonin receptor agonist
4813	3.1	cp	BRD-K69195780	NAN-190	Serotonin receptor agonist
4817	3.14	cp	BRD-K31471398	dihydrexidine	Dopamine receptor agonist
4818	3.14	cp	BRD-K71534238	GW-9508	Free fatty acid receptor agonist
4822	3.18	cp	BRD-K67977190	eprosartan	Angiotensin receptor antagonist
4823	3.18	cp	BRD-A44133049	azasetron	Serotonin receptor antagonist
4834	3.2	cp	BRD-A39415247	norethisterone	Progesterone receptor agonist
4835	3.2	cp	BRD-K65285700	BRD-K65285700	Cannabinoid receptor agonist
4840	3.21	cp	BRD-K60038276	irbesartan	Angiotensin receptor antagonist
4841	3.21	cp	BRD-K78959463	FPL-64176	Calcium channel activator
4843	3.22	cp	BRD-K60762818	desipramine	Tricyclic antidepressant
4844	3.24	cp	BRD-K32906660	bis-tyrphostin	EGFR inhibitor
4854	3.28	cp	BRD-K99498722	NPI-2358	Tubulin inhibitor
4855	3.3	cp	BRD-K52080565	rilmenidine	Imidazoline receptor agonist
4858	3.3	cp	BRD-A29426959	carbinoxamine	Histamine receptor antagonist
4861	3.33	cp	BRD-K48115423	2-(4-methoxybenzylthio)-6-methylpyrimidin-4-ol	Matrix metalloprotease inhibitor
4862	3.34	cp	BRD-K06014311	DH-97	Melatonin receptor antagonist
4863	3.36	cp	BRD-K57179821	crotamiton	Antipruritic
4864	3.38	cp	BRD-K15164005	apoptosis-activator-II	Carboxylesterase inhibitor
4876	3.38	cp	BRD-K99946902	hexylresorcinol	Local anesthetic
4877	3.41	cp	BRD-K18618618	cimetidine	Histamine receptor antagonist
4878	3.42	cp	BRD-A55416093	colforsin	Adenylyl cyclase activator
4885	3.45	cp	BRD-K26160755	RS-45041-190	Imidazoline receptor agonist
4886	3.45	cp	BRD-K55748775	SCH-28080	ATPase inhibitor
4887	3.47	cp	BRD-K00656370	6-aminochrysene	Transferase inhibitor
4888	3.49	cp	BRD-K86434416	selegiline	Monoamine oxidase inhibitor
4889	3.52	cp	BRD-K68620903	dydrogesterone	Progesterone receptor agonist
4890	3.53	cp	BRD-K96271548	coumaric-acid	Antioxidant
4897	3.56	cp	BRD-K48367671	febuxostat	Xanthine oxidase inhibitor
4903	3.56	cp	BRD-K37792168	denbufylline	Phosphodiesterase inhibitor
4909	3.57	cp	BRD-K53220666	trimetozine	Sedative
4910	3.63	cp	BRD-A27887842	prednisolone	Glucocorticoid receptor agonist
4911	3.64	cp	BRD-K05906022	limonin	HIV protease inhibitor
4913	3.66	cp	BRD-K01815685	indole	aryl hydrocarbon receptor agonist
4920	3.66	cp	BRD-K85266041	DNQX	Glutamate receptor antagonist
4921	3.66	cp	BRD-K08890269	CO-102862	Sodium channel blocker
4922	3.66	cp	BRD-A23290232	westcort	Glucocorticoid receptor agonist
4923	3.67	cp	BRD-A17535965	gelsemine	Acetylcholine receptor antagonist
4926	3.73	cp	BRD-K66019333	oxantel	Anthelmintic
4928	3.73	cp	BRD-A61392169	eliprodil	Glutamate receptor antagonist
4929	3.74	cp	BRD-K89375097	pirenzepine	Acetylcholine receptor antagonist
4930	3.74	cp	BRD-K17378184	prestwick-559	Dopamine receptor agonist
4931	3.75	cp	BRD-K46556543	canrenoic-acid	Mineralocorticoid receptor antagonist
4933	3.77	cp	BRD-K24859147	KIN001-242	Protein kinase inhibitor
4941	3.77	cp	BRD-K13544237	r(-)-propylnorapomorphine	Dopamine receptor agonist
4942	3.77	cp	BRD-A13133631	fluorometholone	Glucocorticoid receptor agonist
4943	3.79	cp	BRD-A17453586	MDL-72832	Serotonin receptor agonist
4944	3.8	cp	BRD-K38251852	paxilline	Potassium channel blocker
4945	3.81	cp	BRD-K41564320	purvalanol-b	Tyrosine kinase inhibitor
4946	3.85	cp	BRD-A95696820	acadesine	AMPK activator
4955	3.85	cp	BRD-K91263825	nortriptyline	Tricyclic antidepressant
4956	3.87	cp	BRD-A41451487	PK-11195	Benzodiazepine receptor antagonist
4957	3.88	cp	BRD-A23637604	oxymetholone	Androgen receptor agonist
4960	3.88	cp	BRD-K59058766	chlorprothixene	Dopamine receptor antagonist
4961	3.88	cp	BRD-A42628519	iopanoic-acid	Radiopaque medium
4964	3.88	cp	BRD-K97056771	HY-11007	BCR-ABL kinase inhibitor
4966	3.93	cp	BRD-K28667793	pyrazinamide	Fatty acid synthase inhibitor
4970	3.94	cp	BRD-K50938786	ropivacaine	Sodium channel blocker
4972	3.95	cp	BRD-K99964838	bosutinib	ABL inhibitor
4973	3.95	cp	BRD-A04553218	chlorphenamine	Histamine receptor antagonist
4974	3.95	cp	BRD-A80213327	NSC-23766	Ras GTPase inhibitor
4975	3.96	cp	BRD-K93480852	KN-93	Calcium-calmodulin dependent protein kinase inhibitor
4976	3.96	cp	BRD-A89672324	CGP-55845	GABA receptor antagonist
4991	4	cp	BRD-K20287671	SU-4312	PDGFR receptor inhibitor
4992	4	cp	BRD-A70268693	PG-9	Acetylcholine receptor agonist
4993	4.02	cp	BRD-K06926592	tretinoin	Retinoid receptor agonist
4999	4.03	cp	BRD-K06335600	tizanidine	Adrenergic receptor agonist
5000	4.04	cp	BRD-K39965020	doconexent	PPAR receptor agonist
5001	4.05	cp	BRD-K15868788	SDZ-205-557	Serotonin receptor antagonist
5010	4.05	cp	BRD-K39987650	bisacodyl	Laxative
5012	4.05	cp	BRD-K12102668	nialamide	Monoamine oxidase inhibitor
5015	4.06	cp	BRD-K56403959	ZK-756326	CC chemokine receptor ligand
5016	4.12	cp	BRD-A85472596	L-670596	Prostanoid receptor antagonist
5017	4.16	cp	BRD-A31575449	CGP-20712	Adrenergic receptor antagonist
5018	4.18	cp	BRD-K35240538	methylprednisolone	Glucocorticoid receptor agonist
5019	4.2	cp	BRD-K50311478	tosyl-phenylalanyl-chloromethyl-ketone	Chymotrypsin inhibitor
5023	4.26	cp	BRD-K16336526	capsaicin	TRPV agonist
5027	4.26	cp	BRD-K73196317	urapidil	Adrenergic receptor antagonist
5028	4.27	cp	BRD-K40902647	vincamine	Adrenergic receptor antagonist
5029	4.27	cp	BRD-K23583188	lavendustin-a	EGFR inhibitor
5038	4.3	cp	BRD-K80396088	gliquidone	Sulfonylurea
5039	4.33	cp	BRD-A82590476	SDZ-NKT-343	Tachykinin antagonist
5042	4.36	cp	BRD-K75615183	talipexole	Adrenergic receptor agonist
5047	4.37	cp	BRD-K00532621	midazolam	Benzodiazepine receptor agonist
5048	4.38	cp	BRD-A98378129	talniflumate	Cyclooxygenase inhibitor
5049	4.47	cp	BRD-K26863634	BIX-01338	Histone lysine methyltransferase inhibitor
5056	4.47	cp	BRD-K94689771	pinocembrin	CYP1B1 inhibitor
5057	4.47	cp	BRD-A75368507	demeclocycline	Bacterial 30S ribosomal subunit inhibitor
5058	4.48	cp	BRD-K05528470	L-745870	Dopamine receptor antagonist
5059	4.51	cp	BRD-A91008255	bepridil	Calcium channel blocker
5066	4.55	cp	BRD-A49358627	ciprofibrate	PPAR receptor agonist
5067	4.57	cp	BRD-K67578145	GDC-0879	RAF inhibitor
5071	4.57	cp	BRD-K50135270	GBR-12935	Dopamine uptake inhibitor
5072	4.62	cp	BRD-A50764878	MDL-73005EF	Serotonin receptor antagonist
5073	4.63	cp	BRD-K41445866	alfaxalone	Chloride channel agonist
5078	4.65	cp	BRD-K34820100	tebuthiuron	Photosynthesis inhibitor
5079	4.69	cp	BRD-A36066264	estradiol-benzoate	Estrogen receptor agonist
5081	4.72	cp	BRD-K34330170	rotenonic-acid	Retinoid receptor antagonist
5082	4.72	cp	BRD-A01643550	prednisolone	Glucocorticoid receptor agonist
5085	4.72	cp	BRD-K01612348	meropenem	Bacterial cell wall synthesis inhibitor
5086	4.74	cp	BRD-K53737926	amitriptyline	Norepinephrine inhibitor
5087	4.79	cp	BRD-A60197193	amisulpride	Dopamine receptor antagonist
5096	4.79	cp	BRD-A67605442	tetrahydrobiopterin	Nitric oxide stimulant
5097	4.82	cp	BRD-K34776109	glimepiride	Insulin secretagogue
5098	4.83	cp	BRD-A48720949	testosterone	androgen receptor agonist
5099	4.83	cp	BRD-K17896185	FIT	Opioid receptor agonist
5100	4.86	cp	BRD-K41051431	mecillinam	Bacterial cell wall synthesis inhibitor
5105	4.9	cp	BRD-K44442813	pidotimod	Interferon receptor agonist
5109	4.92	cp	BRD-K64245000	GW-4064	FXR agonist
5110	4.92	cp	BRD-K90027355	spironolactone	Mineralocorticoid receptor antagonist
5111	4.94	cp	BRD-K17674993	diflorasone	Corticosteroid agonist
5117	4.96	cp	BRD-A55946879	BW-B70C	Lipoxygenase inhibitor
5118	5.06	cp	BRD-K29668683	BD-1063	Sigma receptor antagonist
5119	5.09	cp	BRD-K19462402	buflomedil	Adrenergic receptor antagonist
5120	5.1	cp	BRD-A75402480	desoxycorticosterone	Mineralocorticoid receptor agonist
5128	5.1	cp	BRD-A70407468	PSB-36	Adenosine receptor antagonist
5129	5.16	cp	BRD-K13926615	vardenafil	Phosphodiesterase inhibitor
5130	5.16	cp	BRD-K71860425	CDK2-5-inhibitor	CDK inhibitor
5133	5.16	cp	BRD-A10303790	talampicillin	Bacterial cell wall synthesis inhibitor
5136	5.17	cp	BRD-A45333398	periplocymarin	Apoptosis stimulant
5137	5.17	cp	BRD-A16694057	bisphenol-a	PPAR receptor antagonist
5138	5.18	cp	BRD-K63265447	docetaxel	Tubulin inhibitor
5139	5.21	cp	BRD-A74904029	EI-231	Casein kinase inhibitor
5140	5.21	cp	BRD-K52313696	tacedinaline	HDAC inhibitor
5142	5.29	cp	BRD-K71003802	hippeastrine	Plant alkaloid
5143	5.32	cp	BRD-K96402602	farnesylthiotriazole	PPMTase inhibitor
5147	5.33	cp	BRD-K07220430	cinnarizine	Calcium channel blocker
5151	5.37	cp	BRD-K19605405	ZM-241385	Adenosine receptor antagonist
5152	5.38	cp	BRD-K94080537	diethyltoluamide	DEET activator of fly antenna ionotropic receptor IR40a
5153	5.39	cp	BRD-K81209159	herniarin	Acetylcholinesterase inhibitor
5154	5.39	cp	BRD-K72676686	fluvoxamine	Selective serotonin reuptake inhibitor (SSRI)
5155	5.39	cp	BRD-K21350491	phenamil	TRPV antagonist
5158	5.4	cp	BRD-A26097136	bulleyaconitine-a	Non-opiod analgesic
5159	5.41	cp	BRD-K29950728	clomifene	Estrogen receptor antagonist
5160	5.43	cp	BRD-K61323504	SB-225002	CC chemokine receptor antagonist
5161	5.43	cp	BRD-K19284129	salvinorin-a	Opioid receptor agonist
5162	5.43	cp	BRD-K29178788	dictamnine	Furoquinoline alkaloid
5165	5.44	cp	BRD-A09056319	alfuzosin	Adrenergic receptor antagonist
5169	5.48	cp	BRD-K64044582	linoleamide	ACAT inhibitor
5171	5.51	cp	BRD-K87932577	CDK1-5-inhibitor	CDK inhibitor
5175	5.51	cp	BRD-K83063356	RS-102895	CCR antagonist
5439	5.55	cp	BRD-A65013509	oxybutynin	Acetylcholine receptor antagonist
5440	5.62	cp	BRD-K95676198	JAK3-inhibitor-V	JAK inhibitor
5441	5.71	cp	BRD-K76304753	phenazopyridine	Local anesthetic
5442	5.72	cp	BRD-K28307902	flutamide	Androgen receptor antagonist
5443	5.74	cp	BRD-K60274257	dephostatin	Tyrosine phosphatase inhibitor
5444	5.78	cp	BRD-K30189597	SYK-inhibitor	SYK inhibitor
5445	5.79	cp	BRD-K45158365	valsartan	Angiotensin receptor antagonist
5446	5.8	cp	BRD-K55468218	spiperone	Dopamine receptor antagonist
5447	5.85	cp	BRD-K35430135	SR-59230A	Adrenergic receptor antagonist
5448	5.85	cp	BRD-K42748308	XE-991	Potassium channel blocker
5449	5.85	cp	BRD-K63430059	methoxsalen	DNA synthesis inhibitor
5450	5.88	cp	BRD-K14282469	LY-165163	Serotonin receptor antagonist
5451	5.88	cp	BRD-A02759312	betaxolol	Adrenergic receptor antagonist
5452	5.89	cp	BRD-K82846253	repaglinide	Insulin secretagogue
5453	5.93	cp	BRD-K67831364	ZM-323881	VEGFR inhibitor
5454	5.94	cp	BRD-K18855837	varenicline	Acetylcholine receptor agonist
5455	5.95	cp	BRD-K70401845	erlotinib	EGFR inhibitor
5456	5.95	cp	BRD-K51223576	AG-99	Tyrosine kinase inhibitor
5457	5.99	cp	BRD-A96485169	EBPC	Aldose reductase inhibitor
5458	5.99	cp	BRD-K03670461	tyrphostin-AG-82	EGFR inhibitor
5459	5.99	cp	BRD-K61269089	daphnetin	Protein kinase inhibitor
5460	6	cp	BRD-K46937689	phenazone	Cyclooxygenase inhibitor
5461	6.03	cp	BRD-A54236247	racephedrine	Adrenergic receptor agonist
5462	6.07	cp	BRD-A65076780	dihydroergocristine	Adrenergic receptor antagonist
5463	6.09	cp	BRD-A26032986	zaldaride	Calmodulin antagonist
5464	6.1	cp	BRD-K81128206	edrophonium	Acetylcholinesterase inhibitor
5465	6.14	cp	BRD-K04710043	hexamethylenebisacetamide	AKT inhibitor
5466	6.24	cp	BRD-K43736954	cortisone	Glucocorticoid receptor agonist
5467	6.29	cp	BRD-K04146668	GW-441756	Growth factor receptor inhibitor
5468	6.32	cp	BRD-K64670467	JNJ-16259685	Glutamate receptor antagonist
5469	6.36	cp	BRD-K75958195	pizotifen	Serotonin receptor antagonist
5470	6.42	cp	BRD-K47207162	zimelidine	Serotonin reuptake inhibitor
5471	6.44	cp	BRD-A74500471	ethambutol	Bacterial cell wall synthesis inhibitor
5472	6.45	cp	BRD-A65550283	ginsenoside	Steroid hormone receptor agonist
5473	6.45	cp	BRD-K27499107	carbacyclin	IP receptor activator
5474	6.48	cp	BRD-K67100011	pivmecillinam	Bacterial cell wall synthesis inhibitor
5475	6.49	cp	BRD-A51410489	yohimbine	Adrenergic receptor antagonist
5476	6.49	cp	BRD-K59522102	piperine	Monoamine oxidase inhibitor
5477	6.49	cp	BRD-A29082194	gitoxigenin	ATPase inhibitor
5478	6.59	cp	BRD-K91733562	secoisolariciresinol	Antioxidant
6092	6.65	cp	BRD-K91315211	betahistine	Histamine receptor agonist
6093	6.68	cp	BRD-K70327191	benzoxiquine	Anti-infective
6094	6.73	cp	BRD-A42571354	cetirizine	Histamine receptor antagonist
6095	6.76	cp	BRD-A48257147	PHCCC	Glutamate receptor agonist
6096	6.83	cp	BRD-K76064317	tyrphostin-AG-1296	FLT3 inhibitor
6097	6.85	cp	BRD-K07325606	hispidin	PKC inhibitor
6098	6.85	cp	BRD-K64052750	gefitinib	EGFR inhibitor
6099	6.88	cp	BRD-K19360254	ergocornine	Dopamine receptor agonist
6100	6.89	cp	BRD-K35629949	SR-27897	CCK receptor antagonist
6101	6.98	cp	BRD-A02176148	tubaic-acid	Mitochondrial complex I inhibitor
6102	7	cp	BRD-K27141178	SB-203186	Serotonin receptor antagonist
6103	7.01	cp	BRD-K81847782	scandenin	Plant compound with antimicrobial activity
6104	7.01	cp	BRD-K83637872	SANT-1	Smoothened receptor antagonist
6105	7.03	cp	BRD-K63913457	eicosatrienoic-acid	Vasodilator
6106	7.05	cp	BRD-A64977602	mirtazapine	Adrenergic receptor antagonist
6107	7.06	cp	BRD-K91145395	prostratin	PKC activator
6108	7.12	cp	BRD-K42142750	retrorsine	Antimitotic
6110	7.13	cp	BRD-A42423104	benproperine	Antitussive
6111	7.14	cp	BRD-K78485176	olmesartan	Angiotensin receptor antagonist
6114	7.16	cp	BRD-K84996949	sinensetin	Cyclooxygenase inhibitor
6115	7.2	cp	BRD-A50928468	norgestrel	Progesterone receptor agonist
6116	7.21	cp	BRD-A51820102	econazole	Bacterial cell wall synthesis inhibitor
6122	7.23	cp	BRD-K91699951	benzonatate	Local anesthetic
6123	7.24	cp	BRD-A01346607	flumetasone	Glucocorticoid receptor agonist
6124	7.25	cp	BRD-A41995253	brucine	Glycine receptor antagonist
6129	7.29	cp	BRD-K08619574	thioproperazine	Dopamine receptor antagonist
6134	7.29	cp	BRD-K35531059	molsidomine	Guanylyl cyclase activator
6135	7.3	cp	BRD-K76133116	benzydamine	Membrane integrity inhibitor
6136	7.33	cp	BRD-K29173907	isoflupredone	Glucocorticoid receptor agonist
6137	7.47	cp	BRD-K69032158	diprotin-a	Dipeptidyl peptidase inhibitor
6138	7.49	cp	BRD-K30197592	5-methoxytryptamine	Serotonin receptor agonist
6139	7.49	cp	BRD-A84389091	L-655708	GABA receptor inverse agonist
6140	7.5	cp	BRD-A60294240	tribenoside	Anti-inflammatory
6141	7.54	cp	BRD-K50324045	avrainvillamide-analog-6	nucleophosmin inhibitor
6143	7.59	cp	BRD-K41567364	SB-334867	Orexin receptor antagonist
6144	7.6	cp	BRD-A86044036	flurbiprofen	Cyclooxygenase inhibitor
6145	7.65	cp	BRD-K49481516	galantamine	Acetylcholinesterase inhibitor
6146	7.65	cp	BRD-K77947974	fluspirilene	Dopamine receptor antagonist
6147	7.68	cp	BRD-K56115039	BU-226	Imidazoline receptor ligand
6148	7.73	cp	BRD-K25394294	oxaprozin	Cyclooxygenase inhibitor
6150	7.81	cp	BRD-K67637637	olopatadine	Histamine receptor antagonist
6151	7.86	cp	BRD-K68997413	PF-3845	FAAH inhibitor
6152	7.88	cp	BRD-K48300629	zonisamide	Sodium channel blocker
6154	7.91	cp	BRD-K52020312	metronidazole	DNA inhibitor
6155	7.93	cp	BRD-K63068307	ZSTK-474	PI3K inhibitor
6156	7.94	cp	BRD-A77299732	salubrinal	Eukaryotic translation initiation factor inhibitor
6157	7.98	cp	BRD-K29113274	ketoconazole	Sterol demethylase inhibitor
6160	8.07	cp	BRD-A79672927	tropicamide	Acetylcholine receptor antagonist
6161	8.08	cp	BRD-K77390737	xanthohumol	ATPase inhibitor
6166	8.13	cp	BRD-K83302049	protopine	Histamine receptor antagonist
6167	8.14	cp	BRD-A87719232	naproxen	Cyclooxygenase inhibitor
6169	8.17	cp	BRD-K43468059	byssochlamic-acid	Mycotoxin
6170	8.2	cp	BRD-K49668410	clarithromycin	Bacterial 50S ribosomal subunit inhibitor
6171	8.21	cp	BRD-K47323024	methapyrilene	Histamine receptor antagonist
6176	8.23	cp	BRD-K07888196	tyrphostin-AG-538	IGF-1 inhibitor
6179	8.23	cp	BRD-A74980173	gatifloxacin	Bacterial DNA gyrase inhibitor
6182	8.28	cp	BRD-K38305202	domperidone	Dopamine receptor antagonist
6183	8.31	cp	BRD-K11163873	phenanthridone	PARP inhibitor
6184	8.33	cp	BRD-K10065684	dantron	Laxative
6186	8.34	cp	BRD-K51066026	aminoindazole	Ionophore
6187	8.49	cp	BRD-K57033106	tripelennamine	Histamine receptor antagonist
6190	8.49	cp	BRD-K91904471	SD-169	p38 MAPK inhibitor
6191	8.52	cp	BRD-K59574735	ubenimex	Leukotriene inhibitor
6192	8.55	cp	BRD-K90543092	levonorgestrel	Estrogen receptor agonist
6193	8.63	cp	BRD-K80325895	eicosadienoic-acid	-666
6196	8.64	cp	BRD-K21565985	xylazine	Adrenergic receptor agonist
6197	8.81	cp	BRD-K66353228	zoxazolamine	Myorelaxant
6198	8.82	cp	BRD-A65767837	hydrocortisone	Glucocorticoid receptor agonist
6201	8.84	cp	BRD-A68929948	DAPT-GSI-IX	Gamma secretase inhibitor
6202	8.92	cp	BRD-K28806945	L-750667	Dopamine receptor antagonist
6203	8.92	cp	BRD-K18779551	bifemelane	Acetylcholine release stimulant
6204	8.92	cp	BRD-A78942461	ICI-118551	Adrenergic receptor antagonist
6208	8.93	cp	BRD-K81916719	triclabendazole	Microtubule inhibitor
6209	8.93	cp	BRD-K63165456	norcyclobenzaprine	Adrenergic receptor agonist
6210	8.93	cp	BRD-K31633810	DAU-5884	Acetylcholine receptor antagonist
6211	8.93	cp	BRD-A36471396	biperiden	Acetylcholine receptor antagonist
6212	8.93	cp	BRD-K04976539	aminogenistein	SRC inhibitor
6217	8.99	cp	BRD-A82238138	budesonide	Glucocorticoid receptor agonist
6221	9.01	cp	BRD-K25224017	pirenperone	Serotonin receptor antagonist
6222	9.02	cp	BRD-K01648091	LE-300	Dopamine receptor antagonist
6223	9.02	cp	BRD-K33308633	INCA-6	Calcineurin inhibitor
6226	9.12	cp	BRD-K04196797	oxcarbazepine	Sodium channel blocker
6227	9.16	cp	BRD-K82036761	sertraline	Serotonin receptor antagonist
6231	9.23	cp	BRD-A85234536	N6-cyclopentyladenosine	Adenosine receptor agonist
6232	9.27	cp	BRD-K29653726	topiramate	Carbonic anhydrase inhibitor
6233	9.33	cp	BRD-A71765365	mepireserpate	Catecholamine depleting sympatholytic
6234	9.34	cp	BRD-K54330070	SB-202190	p38 MAPK inhibitor
6235	9.35	cp	BRD-A76093993	cromakalim	Potassium channel activator
6236	9.36	cp	BRD-A18579359	wiskostatin	Neural Wiskott-Aldrich syndrome protein inhibitor
6237	9.36	cp	BRD-K18742343	H-8	PKA inhibitor
6245	9.4	cp	BRD-K46384212	o-3M3FBS	phospholipase activator
6249	9.44	cp	BRD-K96319534	phentermine	Dopamine uptake inhibitor
6250	9.47	cp	BRD-K21853356	RG-14620	EGFR inhibitor
6251	9.49	cp	BRD-K04993501	cefixime	Bacterial cell wall synthesis inhibitor
6252	9.52	cp	BRD-K51918615	iodophenpropit	Histamine receptor antagonist
6253	9.53	cp	BRD-K70557564	zosuquidar	P-glycoprotein inhibitor
6254	9.6	cp	BRD-K85242180	beta-CCP	Indoleamine 2,3-dioxygenase inhibitor
6260	9.61	cp	BRD-K26573499	DMAB-anabaseine	Adrenergic receptor agonist
6261	9.65	cp	BRD-K49372556	mofezolac	Cyclooxygenase inhibitor
6265	9.66	cp	BRD-K54142781	cirazoline	Adrenergic receptor agonist
6266	9.69	cp	BRD-A17655518	ibuprofen	Cyclooxygenase inhibitor
6273	9.71	cp	BRD-K96740444	itopride	Dopamine receptor antagonist
6274	9.71	cp	BRD-K80672993	M2-PK-activator	-666
6275	9.73	cp	BRD-K82561139	ricinine	Casein kinase inhibitor
6277	9.77	cp	BRD-A03216249	mepivacaine	Potassium channel blocker
6278	9.79	cp	BRD-A00993607	alprenolol	Adrenergic receptor antagonist
6279	9.8	cp	BRD-K80639402	SB-258585	Serotonin receptor antagonist
6284	9.83	cp	BRD-K18574842	nafcillin	Bacterial cell wall synthesis inhibitor
6287	9.86	cp	BRD-A46393198	tetramisole	Immunostimulant
6290	9.89	cp	BRD-A31007383	SDZ-WAG-994	Adenosine receptor agonist
6292	9.91	cp	BRD-A06784547	MRS-1334	Adenosine receptor antagonist
6293	9.92	cp	BRD-A16478930	amcinonide	Glucocorticoid receptor agonist
6294	10.02	cp	BRD-A68888262	azelastine	Histamine receptor antagonist
6295	10.07	cp	BRD-K82865713	prostaglandin-b2	cAMP inhibitor
6297	10.07	cp	BRD-K08806317	timolol	Adrenergic receptor antagonist
6298	10.08	cp	BRD-K39823328	VU-0366037-2	Glutamate receptor modulator
6299	10.11	cp	BRD-K10467831	tibolone	Androgen receptor agonist
6304	10.12	cp	BRD-K31553034	zibotentan	Endothelin receptor antagonist
6307	10.14	cp	BRD-A80775386	hyperforin	Cyclooxygenase inhibitor
6310	10.22	cp	BRD-K10042277	desmethylclozapine	Acetylcholine receptor agonist
6311	10.22	cp	BRD-K67680372	CI-966	GAT inhibitor
6312	10.23	cp	BRD-K23369905	oxiconazole	Bacterial cell wall synthesis inhibitor
6313	10.25	cp	BRD-A39255369	DCPIB	Chloride channel blocker
6315	10.26	cp	BRD-K12002134	megestrol	progesterone receptor agonist
6316	10.28	cp	BRD-K97799481	theophylline	Adenosine receptor antagonist
6317	10.29	cp	BRD-A24817035	laudanosine	Central nervous system agent
6318	10.32	cp	BRD-A32349859	methyl-angolensate	Apoptosis inhibitor
6320	10.36	cp	BRD-A50311610	meclozine	CAR agonist
6323	10.39	cp	BRD-K03642198	AY-9944	Hedgehog pathway modulator
6324	10.44	cp	BRD-K89402695	L-655240	Thromboxane receptor antagonist
6328	10.55	cp	BRD-K94379058	BML-190	Cannabinoid receptor inverse agonist
6336	10.57	cp	BRD-K93441486	diphemanil	Acetylcholine receptor antagonist
6337	10.6	cp	BRD-K66874953	pifithrin-alpha	TP53 inhibitor
6341	10.63	cp	BRD-K39746403	erythromycin	NFkB pathway inhibitor
6342	10.69	cp	BRD-A94793051	gestrinone	Progesterone receptor antagonist
6345	10.7	cp	BRD-A11990600	lorazepam	Benzodiazepine receptor agonist
6346	10.7	cp	BRD-K12219985	glipizide	Sulfonylurea
6347	10.78	cp	BRD-K82255054	propofol	GABA receptor agonist
6349	10.87	cp	BRD-K11742128	triprolidine	Histamine receptor antagonist
6350	10.88	cp	BRD-K41903098	diphenoxylate	Opioid receptor agonist
6353	10.88	cp	BRD-K46678324	RHO-kinase-inhibitor-II	Rho associated kinase inhibitor
6358	10.94	cp	BRD-K22662435	ganciclovir	DNA polymerase inhibitor
6361	10.98	cp	BRD-K07212038	selinidin	Mast cell stabilizer
6362	11.01	cp	BRD-K27710560	splitomycin	SIRT inhibitor
6363	11.02	cp	BRD-K45068323	W-13	Calmodulin antagonist
6367	11.03	cp	BRD-K81521265	dicyclohexylurea	Epoxide hydolase inhibitor
6368	11.06	cp	BRD-A16754160	ampicillin	Bacterial cell wall synthesis inhibitor
6370	11.15	cp	BRD-K92413528	thiazolidinecarboxylic-acid	Reducing agent
6373	11.18	cp	BRD-K57304726	PRE-084	Sigma receptor agonist
6377	11.28	cp	BRD-A13650332	flucloxacillin	Bacterial cell wall synthesis inhibitor
6380	11.33	cp	BRD-K49890030	gavestinel	Glutamate receptor antagonist
6381	11.34	cp	BRD-K77771411	moxonidine	Imidazoline receptor agonist
6383	11.39	cp	BRD-U01690642	acetyl-geranyl-cysteine	Isoprenylated protein methylation inhibitor
6384	11.44	cp	BRD-K21283037	riluzole	Glutamate inhibitor
6389	11.44	cp	BRD-A18620900	estriol	Estrogen receptor agonist
6390	11.49	cp	BRD-K79404599	enzastaurin	PKC inhibitor
6394	11.56	cp	BRD-A35912562	pregnenolone	Glutamate receptor modulator
6395	11.76	cp	BRD-K80451230	zamifenacin	Acetylcholine receptor antagonist
6397	11.79	cp	BRD-A82096673	KU-C103428N	CDC inhibitor
6400	11.8	cp	BRD-K70577657	H-9	PKA inhibitor
6401	11.87	cp	BRD-K78692225	leflunomide	Dihydroorotate dehydrogenase inhibitor
6402	11.87	cp	BRD-A07824748	flavanone	11-beta-HSD1 inhibitor
6405	11.89	cp	BRD-K86204871	terconazole	Sterol demethylase inhibitor
6411	11.9	cp	BRD-K45435259	SCH-23390	Dopamine receptor antagonist
6412	11.99	cp	BRD-A66563878	medetomidine	Adrenergic receptor agonist
6413	12.02	cp	BRD-A75517195	thiazolopyrimidine	CDC inhibitor
6416	12.04	cp	BRD-K36009368	NNC-63-0532	Opioid receptor agonist
6417	12.06	cp	BRD-K13800121	parecoxib	Cyclooxygenase inhibitor
6418	12.17	cp	BRD-A39969961	eplerenone	Cytochrome P450 inhibitor
6419	12.25	cp	BRD-K21667562	AM-404	Cyclooxygenase inhibitor
6420	12.27	cp	BRD-A31312900	montelukast	Leukotriene receptor antagonist
6424	12.4	cp	BRD-K12079898	PD-160170	Neuropeptide receptor antagonist
6426	12.4	cp	BRD-A11813248	AM-92016	Potassium channel blocker
6428	12.46	cp	BRD-K97354755	SU-6656	SRC inhibitor
6429	12.66	cp	BRD-K37447567	hydrocotarnine	Opioid receptor antagonist
6430	12.73	cp	BRD-K55034111	pefloxacin	Bacterial DNA gyrase inhibitor
6431	12.87	cp	BRD-A68723818	brompheniramine	Histamine receptor antagonist
6434	12.9	cp	BRD-K40175214	torin-1	MTOR inhibitor
6437	12.94	cp	BRD-K37991163	paroxetine	Selective serotonin reuptake inhibitor (SSRI)
6441	12.97	cp	BRD-A77118605	BML-ST330	Phospholipase inhibitor
6442	12.97	cp	BRD-A78295502	hydroquinine	Antiarrhythmic
6443	13.02	cp	BRD-K96809896	SKF-86002	p38 MAPK inhibitor
6445	13.17	cp	BRD-A93206962	L-755507	Adrenergic receptor agonist
6448	13.33	cp	BRD-K06221026	DUP-697	Cyclooxygenase inhibitor
6449	13.42	cp	BRD-A55913614	primaquine	Antimalarial
6452	13.43	cp	BRD-U86922168	QL-XII-47	BTK inhibitor
6456	13.52	cp	BRD-A83892713	rifampicin	RNA polymerase inhibitor
6460	13.52	cp	BRD-A10969569	ambelline	Plant alkaloid
6468	13.56	cp	BRD-K01567962	pyrazolanthrone	JNK inhibitor
6469	13.56	cp	BRD-K27871032	lysergol	Ergoline alkaloid
6470	13.59	cp	BRD-K49448285	bisindolylmaleimide	CDK inhibitor
6473	13.61	cp	BRD-A39390670	rabeprazole	ATPase inhibitor
6474	13.63	cp	BRD-K05464208	JX-401	p38 MAPK inhibitor
6480	13.71	cp	BRD-K88759641	EMD-66684	Angiotensin receptor antagonist
6484	13.74	cp	BRD-K54987996	CAY-10578	Casein kinase inhibitor
6489	13.74	cp	BRD-A80793822	pemoline	Dopamine receptor agonist
6495	13.78	cp	BRD-K16621777	enobosarm	Androgen receptor modulator
6499	13.85	cp	BRD-A93659613	GR-89696	Opioid receptor agonist
6500	13.92	cp	BRD-A16934955	nalbuphine	Opioid receptor agonist
6514	14.12	cp	BRD-A62021152	WAY-161503	Serotonin receptor agonist
6519	14.13	cp	BRD-K81225797	SCH-58261	Adenosine receptor antagonist
6520	14.16	cp	BRD-K12539581	nocodazole	Tubulin inhibitor
6521	14.19	cp	BRD-K63630713	etacrynic-acid	Sodium/potassium/chloride transporter inhibitor
6522	14.21	cp	BRD-K91601245	mercaptopurine	Immunosuppressant
6527	14.22	cp	BRD-K17561142	amiodarone	Potassium channel blocker
6528	14.23	cp	BRD-K12260308	xanthoxyline	Antifungal
6530	14.24	cp	BRD-A81795050	U-18666A	Oxidosqualene cyclase inhibitor
6532	14.29	cp	BRD-A71009679	KUC103420N	-666
6537	14.32	cp	BRD-A73741725	exemestane	Aromatase inhibitor
6542	14.4	cp	BRD-K13725475	rhodomyrtoxin	Cytotoxic agent
6545	14.49	cp	BRD-K91290917	amodiaquine	Histamine receptor agonist
6546	14.49	cp	BRD-K92000912	AM-251	Cannabinoid receptor antagonist
6547	14.51	cp	BRD-A27489425	rolitetracycline	Bacterial 30S ribosomal subunit inhibitor
6556	14.53	cp	BRD-K35458079	edaravone	Nootropic agent
6558	14.6	cp	BRD-K78084463	W-12	Calmodulin antagonist
6560	14.63	cp	BRD-A94543220	bifonazole	Sterol demethylase inhibitor
6564	14.66	cp	BRD-K18799075	BAY-59-3074	Cannabinoid receptor partial agonist
6565	14.68	cp	BRD-K12120659	GR-144053	Integrin antagonist
6569	14.78	cp	BRD-K08132273	tyrphostin	EGFR inhibitor
6571	14.95	cp	BRD-A52660433	tetrindole	Monoamine oxidase inhibitor
6572	15.04	cp	BRD-K63945320	dihydrosamidin	Phospholipase inhibitor
6577	15.05	cp	BRD-A35623999	CGP-37157	L-type calcium channel blocker
6578	15.09	cp	BRD-K88568253	iproniazid	Monoamine oxidase inhibitor
6580	15.15	cp	BRD-A89434049	sarmentogenin	ATPase inhibitor
6582	15.19	cp	BRD-A75935363	atracurium	Acetylcholine receptor antagonist
6583	15.26	cp	BRD-K36616567	doxepin	Histamine receptor antagonist
6585	15.27	cp	BRD-K86595100	chlordiazepoxide	Benzodiazepine receptor agonist
6590	15.42	cp	BRD-K16664969	GTP-14564	FLT3 inhibitor
6596	15.5	cp	BRD-K28863208	PNU-282987	Cholinergic receptor agonist
6598	15.64	cp	BRD-K11905747	spectinomycin	Bacterial 30S ribosomal subunit inhibitor
6599	15.67	cp	BRD-A34208323	VU-0404997-2	Glutamate receptor modulator
6601	15.68	cp	BRD-K86301799	dipyridamole	Phosphodiesterase inhibitor
6603	15.7	cp	BRD-A00100033	nifurtimox	DNA inhibitor
6605	15.76	cp	BRD-K51302260	KU-C103871	GSP agonist
6607	15.78	cp	BRD-A16665823	butoconazole	Bacterial cell wall synthesis inhibitor
6608	15.79	cp	BRD-K82381502	acetylcholine	Acetylcholine receptor agonist
6609	15.94	cp	BRD-K88551539	CAY-10585	HIF modulator
6612	16	cp	BRD-K20714604	RS-56812	Serotonin receptor partial agonist
6613	16.04	cp	BRD-A41450521	tosufloxacin	Bacterial DNA gyrase inhibitor
6616	16.05	cp	BRD-K05104363	PD-184352	MEK inhibitor
6617	16.1	cp	BRD-K32821942	azathioprine	Dehydrogenase inhibitor
6621	16.22	cp	BRD-A43671941	oxprenolol	Adrenergic receptor antagonist
6626	16.23	cp	BRD-K43068349	AMG-9810	TRPV antagonist
6628	16.39	cp	BRD-K24132293	piperlongumine	Glutathione transferase inhibitor
6629	16.4	cp	BRD-K96263742	GW-7647	PPAR receptor agonist
6631	16.45	cp	BRD-A00758722	noretynodrel	Progestogen hormone
6632	16.55	cp	BRD-K05396879	15-delta-prostaglandin-j2	PPAR receptor agonist
6633	16.59	cp	BRD-K66707493	lawsone	Coloring agent
6636	16.6	cp	BRD-K83144676	olmesartan	Angiotensin antagonist
6637	16.67	cp	BRD-K06467078	corynanthine	Adrenergic receptor antagonist
6638	16.68	cp	BRD-K32696739	noreleagnine	Monoamine oxidase inhibitor
6641	16.78	cp	BRD-K85503079	perospirone	Dopamine receptor antagonist
6642	16.79	cp	BRD-A82656074	naltrindole	Opioid receptor antagonist
6644	16.8	cp	BRD-K75478907	GS-39783	GABA receptor modulator
6646	16.86	cp	BRD-K29555132	arachidonamide	Cannabinoid receptor agonist
6651	16.9	cp	BRD-K72029282	probucol	Atherogenesis inhibitor
6652	16.95	cp	BRD-K76534306	enrofloxacin	Bacterial DNA gyrase inhibitor
6653	17.04	cp	BRD-K07888107	depudecin	HDAC inhibitor
6657	17.09	cp	BRD-A04308630	genipin	Choleretic agent
6662	17.16	cp	BRD-K64890080	BI-2536	PLK inhibitor
6664	17.25	cp	BRD-K66956375	oleoylethanolamide	Cannabinoid receptor agonist
6665	17.26	cp	BRD-K09132007	D-4476	TGF beta receptor inhibitor
6668	17.42	cp	BRD-K76274772	MAPP-D-erythro	Ceramidase inhibitor
6669	17.43	cp	BRD-A10977446	carvedilol	Adrenergic receptor antagonist
6673	17.51	cp	BRD-A61856038	tremulacin	Lipoxygenase inhibitor
6674	17.56	cp	BRD-K62363391	dapsone	Bacterial antifolate
6676	17.65	cp	BRD-A99411506	esculin	Antioxidant
6677	17.69	cp	BRD-K50866992	tropisetron	Serotonin receptor antagonist
6680	17.71	cp	BRD-K28115081	apafant	Platelet activating factor receptor antagonist
6683	17.92	cp	BRD-A97730597	hexylcaine	Sodium channel blocker
6686	17.97	cp	BRD-A79237180	ascorbic-acid	Antioxidant
6689	17.98	cp	BRD-K99616396	motesanib	KIT inhibitor
6691	18.07	cp	BRD-K46469693	SCH-442416	Adenosine receptor antagonist
6694	18.17	cp	BRD-A33168282	sotalol	Adrenergic receptor antagonist
6695	18.2	cp	BRD-K56614220	clofazimine	GK0582 inhibitor
6696	18.23	cp	BRD-A51829654	BRL-15572	Serotonin receptor antagonist
6702	18.25	cp	BRD-A50675702	fipronil	GABA gated chloride channel blocker
6704	18.27	cp	BRD-K94294671	OSI-027	MTOR inhibitor
6705	18.43	cp	BRD-A43940795	tetrahydropalmatine	Serotonin release inhibitor
6706	18.43	cp	BRD-A72483914	spiroxatrine	Serotonin receptor antagonist
6707	18.45	cp	BRD-K97061094	azacyclonol	Histamine receptor antagonist
6709	18.46	cp	BRD-K18059238	gamma-linolenic-acid	Cyclooxygenase inhibitor
6710	18.47	cp	BRD-K32330832	VER-155008	HSP inhibitor
6711	18.52	cp	BRD-K71499074	diclofenamide	Carbonic anhydrase inhibitor
6712	18.54	cp	BRD-K17743697	KB-R7943	Sodium/calcium exchange inhibitor
6713	18.59	cp	BRD-K98157055	SIB-1757	Glutamate receptor antagonist
6719	18.62	cp	BRD-K02123250	JNJ-38877605	Tyrosine kinase inhibitor
6723	18.76	cp	BRD-K90976994	dehydrocholic-acid	Bile acid
6724	18.78	cp	BRD-K40645748	mefloquine	Adenosine receptor antagonist
6727	18.79	cp	BRD-K51671335	sulpiride	Dopamine receptor antagonist
6728	18.8	cp	BRD-K19227686	phenolphthalein	Indicator dye
6729	18.88	cp	BRD-K36529613	PU-H71	HSP inhibitor
6733	18.92	cp	BRD-K43764301	dexketoprofen	Cyclooxygenase inhibitor
6738	18.94	cp	BRD-A96897502	U-74389F	Lipid peroxidase inhibitor
6740	18.97	cp	BRD-A72758037	asiatic-acid	Apoptosis stimulant
6741	19.14	cp	BRD-K14765469	vesamicol	Acetylcholinesterase inhibitor
6742	19.24	cp	BRD-K64881305	ispinesib	Kinesin-like spindle protein inhibitor
6743	19.35	cp	BRD-A94669766	naringenin	Aromatase inhibitor
6745	19.35	cp	BRD-K46424862	hymecromone	Monoamine oxidase inhibitor
6750	19.4	cp	BRD-A88254928	salbutamol	Adrenergic receptor agonist
6753	19.4	cp	BRD-K51677086	erythromycin	NFkB pathway inhibitor
6759	19.45	cp	BRD-K05737787	isoeugenol	Nitric oxide production inhibitor
6763	19.47	cp	BRD-A92630576	trimebutine	Opioid receptor agonist
6764	19.49	cp	BRD-K30097969	pitavastatin	HMGCR inhibitor
6768	19.57	cp	BRD-K78294846	osthol	Calcium channel blocker
6770	19.6	cp	BRD-K37618799	MRS-1220	Adenosine receptor antagonist
6772	19.62	cp	BRD-K10016611	pyridine-2-aldoxime	Acetylcholinesterase inhibitor
6773	19.69	cp	BRD-K82731415	olomoucine	CDK inhibitor
6774	19.71	cp	BRD-U33728988	QL-X-138	MTOR inhibitor
6781	19.79	cp	BRD-A77349281	RK-682	Tyrosine phosphatase inhibitor
6783	19.85	cp	BRD-K54665485	R-59022	Diacylglycerol kinase inhibitor
6786	19.91	cp	BRD-A75479906	rimantadine	Antiviral
6787	19.95	cp	BRD-K67860401	AR-A014418	Glycogen synthase kinase inhibitor
6788	20.01	cp	BRD-K20482099	rutin	Antioxidant
6794	20.15	cp	BRD-K30570479	VU-0400195-3	Glutamate receptor modulator
6797	20.29	cp	BRD-K13261168	LY-16350	Dopamine receptor agonist
6798	20.4	cp	BRD-K32318651	acyclovir	DNA polymerase inhibitor
6800	20.43	cp	BRD-K82164249	andarine	Androgen receptor modulator
6802	20.43	cp	BRD-K73109821	diazoxide	Potassium channel activator
6807	20.58	cp	BRD-K35573744	erbstatin-analog	EGFR inhibitor
6808	20.63	cp	BRD-K50495309	SRC-kinase-inhibitor-I	SRC inhibitor
6812	20.63	cp	BRD-K96354014	nifedipine	Calcium channel blocker
6813	20.69	cp	BRD-A05186015	bupropion	Dopamine uptake inhibitor
6814	20.77	cp	BRD-A72066420	mifobate	PPAR receptor antagonist
6815	20.77	cp	BRD-K56343971	vemurafenib	RAF inhibitor
6817	20.84	cp	BRD-A69512159	carbidopa	Aromatic L-amino acid decarboxylase inhibitor
6819	20.87	cp	BRD-K52397688	amperozide	Dopamine receptor antagonist
6821	20.94	cp	BRD-K97309399	thiothixene	Dopamine receptor antagonist
6822	21.13	cp	BRD-K09537769	NU-7026	DNA dependent protein kinase inhibitor
6826	21.13	cp	BRD-K45117373	Y-26763	Potassium channel activator
6828	21.18	cp	BRD-A94709349	metaxalone	Muscle relaxant
6830	21.32	cp	BRD-K95885906	quercetagetin	PIM inhibitor
6834	21.34	cp	BRD-K26818574	BIX-01294	Histone lysine methyltransferase inhibitor
6835	21.36	cp	BRD-K45479396	BP-554	Serotonin receptor agonist
6836	21.41	cp	BRD-K27351809	nomegestrol	Progesterone receptor agonist
6838	21.5	cp	BRD-K90524085	MY-5445	Phosphodiesterase inhibitor
6839	21.5	cp	BRD-K63641886	cefuroxime	Bacterial cell wall synthesis inhibitor
6846	21.67	cp	BRD-K06198550	isorotenone	Mitochondrial complex I inhibitor
6847	21.71	cp	BRD-K85030058	benactyzine	Acetylcholine receptor antagonist
6849	21.83	cp	BRD-K38436528	imipramine	Norepinephrine reuptake inhibitor
6850	21.95	cp	BRD-K96037667	norethindrone	Progesterone receptor agonist
6851	22.02	cp	BRD-K39462424	dexchlorpheniramine	Histamine receptor antagonist
6856	22.03	cp	BRD-K60160658	tiagabine	GABA uptake inhibitor
6857	22.04	cp	BRD-K68402494	ML-9	Myosin light chain kinase inhibitor
6859	22.1	cp	BRD-A56987319	SQ-22536	Adenylyl cyclase inhibitor
6867	22.21	cp	BRD-K25079130	avrainvillamide-analog-4	nucleophosmin inhibitor
6868	22.28	cp	BRD-K73397362	purmorphamine	Smoothened receptor agonist
6871	22.53	cp	BRD-A47633927	NPC-15199	ICAM1 antagonist
6872	22.58	cp	BRD-K22227508	targinine	Nitric oxide synthase inhibitor
6882	22.58	cp	BRD-K92760278	riboflavin	Vitamin B
6885	22.58	cp	BRD-K67017579	cilostazol	Phosphodiesterase inhibitor
6887	22.59	cp	BRD-K50417881	eticlopride	Dopamine receptor antagonist
6889	22.62	cp	BRD-K02590140	O-2050	Cannabinoid receptor antagonist
6890	22.9	cp	BRD-A49046702	SKF-89976A	GABA uptake inhibitor
6895	23.17	cp	BRD-K18619710	digoxigenin	Steroid
6897	23.69	cp	BRD-K49328571	dasatinib	BCR-ABL kinase inhibitor
6898	23.83	cp	BRD-K56700933	phenethyl-isothiocyanate	Antineoplastic
6899	23.86	cp	BRD-A27554692	altrenogest	Progestogen hormone
6900	23.89	cp	BRD-K06388322	pramipexole	Dopamine receptor agonist
6901	24.25	cp	BRD-A62434282	goserelin	Gonadotropin releasing factor hormone receptor agonist
6903	24.34	cp	BRD-A52326238	isogedunin	HSP inhibitor
6908	24.43	cp	BRD-K72726508	arcyriaflavin-a	CDK inhibitor
6911	24.43	cp	BRD-A47513740	calyculin	Protein phosphatase inhibitor
6912	24.45	cp	BRD-K90733503	cefalexin	Bacterial cell wall synthesis inhibitor
6917	24.48	cp	BRD-K92015269	GBR-12783	Dopamine uptake inhibitor
6923	24.59	cp	BRD-K40992116	parachlorophenol	Anti-infective
6925	24.62	cp	BRD-K34092021	arvanil	TRPV agonist
6930	24.75	cp	BRD-K40990712	hexamethyleneamiloride	Sodium/hydrogen antiport inhibitor
6933	24.8	cp	BRD-K63504947	semaxanib	VEGFR inhibitor
6934	24.89	cp	BRD-A34806832	proscillaridin	ATPase inhibitor
6935	24.93	cp	BRD-U66370498	androstanol	CAR antagonist
6939	25.06	cp	BRD-K73982490	BI-78D3	JNK inhibitor
6941	25.07	cp	BRD-K10852020	tolcapone	Catechol O methyltransferase inhibitor
6943	25.12	cp	BRD-A58048407	nimodipine	Calcium channel blocker
6944	25.13	cp	BRD-K23566484	nilutamide	Androgen receptor antagonist
6948	25.3	cp	BRD-K28143534	cyproheptadine	Histamine receptor antagonist
6949	25.3	cp	BRD-K92138166	mammea-a	other antibiotic
6950	25.6	cp	BRD-K31627533	rimexolone	Glucocorticoid receptor agonist
6953	25.87	cp	BRD-K66782112	BRD-K66782112	Histamine receptor antagonist
6956	26.01	cp	BRD-K63675182	triflupromazine	Dopamine receptor antagonist
6958	26.08	cp	BRD-A51382177	fosinopril	ACE inhibitor
6959	26.1	cp	BRD-K53263234	CITCO	CAR agonist
6961	26.56	cp	BRD-A52193669	withaferin-a	IKK inhibitor
6965	26.57	cp	BRD-K51485625	ritonavir	HIV protease inhibitor
6967	26.86	cp	BRD-A66927094	nemonapride	Dopamine receptor antagonist
6968	26.91	cp	BRD-A54596827	solifenacin	Acetylcholine receptor antagonist
6969	27	cp	BRD-K89274813	DMP-543	Acetylcholine release stimulant
6974	27.08	cp	BRD-K39621635	artemether	Antimalarial
6975	27.38	cp	BRD-K70487031	flupentixol	Dopamine receptor antagonist
6978	27.38	cp	BRD-K00312224	PPT	Estrogen receptor agonist
6980	27.39	cp	BRD-K82795137	loratadine	Histamine receptor antagonist
6983	27.44	cp	BRD-K44899736	RO-16-6941	Monoamine oxidase inhibitor
6984	27.44	cp	BRD-K87158025	benzamil	Sodium channel blocker
6985	27.47	cp	BRD-K40782193	QX-222	Sodium channel blocker
6986	27.74	cp	BRD-K55454768	TAS-301	Calcium-calmodulin dependent protein kinase inhibitor
6987	27.76	cp	BRD-A64933752	CV-1808	Adenosine receptor agonist
6989	27.9	cp	BRD-K86003836	flubendazole	Tubulin inhibitor
6991	27.95	cp	BRD-A99833829	bethanechol	Acetylcholine receptor agonist
6993	27.99	cp	BRD-K97863768	prothionamide	Mycobacterium tuberculosis enoyl-[acyl-carrier-protein] reductase [NADH] (inhA) inhibitor
6996	28.08	cp	BRD-A41692738	TGX-221	PI3K inhibitor
6998	28.14	cp	BRD-K68756823	FR-180204	-666
6999	28.15	cp	BRD-K83972459	JWE-035	Aurora kinase inhibitor
7004	28.15	cp	BRD-K95921201	reserpine	Vesicular monoamine transporter inhibitor
7005	28.19	cp	BRD-A41301928	bongkrek-acid	Mitochondrial ADP, ATP translocase inhibitor
7007	28.3	cp	BRD-A22684332	procaterol	Adrenergic receptor agonist
7010	28.42	cp	BRD-K26117720	gingerol	Nitric oxide synthase inhibitor
7012	28.72	cp	BRD-A01787639	naftopidil	Adrenergic receptor antagonist
7013	28.72	cp	BRD-K87573634	propylpyrazole	Estrogen receptor agonist
7015	28.76	cp	BRD-A96799240	4-hydroxyretinoic-acid	Retinoid receptor binder
7016	29.07	cp	BRD-K59419204	AM-281	Cannabinoid receptor antagonist
7022	29.16	cp	BRD-K66175015	afatinib	EGFR inhibitor
7026	29.25	cp	BRD-K28849549	mesalazine	Cyclooxygenase inhibitor
7029	29.56	cp	BRD-K62792802	LY-83583	Guanylyl cyclase inhibitor
7030	29.82	cp	BRD-K36737713	AG-957	Protein tyrosine kinase inhibitor
7031	29.9	cp	BRD-K31843556	T-0070907	PPAR receptor antagonist
7033	29.93	cp	BRD-A88774919	doxycycline	Bacterial 30S ribosomal subunit inhibitor
7034	29.99	cp	BRD-A42167015	carteolol	Adrenergic receptor antagonist
7035	30.16	cp	BRD-K03440695	boldine	Acetylcholine receptor antagonist
7039	30.22	cp	BRD-A00520476	otenzepad	Acetylcholine receptor antagonist
7042	30.35	cp	BRD-K71289571	zafirlukast	Leukotriene receptor antagonist
7044	30.36	cp	BRD-A95096829	PNU-96415E	Dopamine receptor antagonist
7046	30.37	cp	BRD-K30240666	clemastine	Histamine receptor antagonist
7048	30.51	cp	BRD-K54094468	remoxipride	Dopamine receptor antagonist
7050	30.7	cp	BRD-K93201660	ML-7	Myosin light chain kinase inhibitor
7051	30.75	cp	BRD-K56745457	azauridine	Antiviral
7057	30.85	cp	BRD-A56245458	reichstein	Androgen receptor antagonist
7058	30.94	cp	BRD-K06792661	narciclasine	Coflilin signaling pathway activator
7059	30.97	cp	BRD-K82135108	elesclomol	Oxidative stress inducer
7062	31.15	cp	BRD-K41410256	balsalazide	Cyclooxygenase inhibitor
7064	31.17	cp	BRD-K20920669	cromoglicic-acid	Immunosuppressant
7065	31.3	cp	BRD-K87990216	piretanide	Glucocorticoid receptor agonist
7068	31.3	cp	BRD-K03557653	sappanone-a	Tyrosinase inhibitor
7071	31.34	cp	BRD-K30649484	mafenide	Carbonic anhydrase inhibitor
7072	31.6	cp	BRD-A43150328	penicillic-acid	other antibiotic
7073	31.76	cp	BRD-K05434375	HA-1004	Calcium channel blocker
7075	31.88	cp	BRD-K32398298	alprazolam	Benzodiazepine receptor agonist
7080	31.98	cp	BRD-K70490179	rimcazole	Sigma receptor antagonist
7081	32.12	cp	BRD-A54927599	KF-38789	P-selectin inhibitor
7082	32.17	cp	BRD-K94512704	spiramide	Dopamine receptor antagonist
7083	32.2	cp	BRD-A13807286	HA-14-1	BCL inhibitor
7087	32.4	cp	BRD-K00234327	RU-24969	Serotonin receptor agonist
7089	32.48	cp	BRD-K12244279	MEK1-2-inhibitor	MEK inhibitor
7093	32.58	cp	BRD-K40656405	L-165041	PPAR receptor agonist
7095	32.59	cp	BRD-K93460210	lamotrigine	Serotonin receptor antagonist
7097	32.62	cp	BRD-A18763547	BAX-channel-blocker	Cytochrome C release inhibitor
7098	32.73	cp	BRD-K22947005	dexbrompheniramine	Histamine receptor antagonist
7099	32.88	cp	BRD-A09828896	SKF-81297	Dopamine receptor agonist
7101	32.98	cp	BRD-K17110974	aristolochic-acid	Phospholipase inhibitor
7102	33.19	cp	BRD-K42452249	EO-1428	p38 MAPK inhibitor
7103	33.22	cp	BRD-K09186807	KIN001-244	Phosphoinositide dependent kinase inhibitor
7108	33.41	cp	BRD-K30677119	PP-30	RAF inhibitor
7110	33.85	cp	BRD-K47278471	diphenhydramine	Histamine receptor antagonist
7111	33.85	cp	BRD-A93424738	dexamethasone	Glucocorticoid receptor agonist
7113	33.87	cp	BRD-K63150726	JTE-907	Cannabinoid receptor inverse agonist
7118	33.89	cp	BRD-K59637651	NSC-119889	Protein synthesis inhibitor
7119	34.07	cp	BRD-A51182606	chloramphenicol	Protein synthesis inhibitor
7122	34.18	cp	BRD-K62959606	sphingosine	Ceramidase inhibitor
7127	34.31	cp	BRD-A09722536	cyclophosphamide	DNA alkylating agent
7129	34.49	cp	BRD-A54845972	dihydroergotamine	Serotonin receptor agonist
7140	34.55	cp	BRD-K76908866	CP-724714	EGFR inhibitor
7142	34.6	cp	BRD-A93477898	PETCM	Caspase activator
7146	34.64	cp	BRD-K33312228	halometasone	Glucocorticoid receptor agonist
7148	34.86	cp	BRD-K69840642	ISOX	HDAC inhibitor
7151	34.89	cp	BRD-K63343048	orlistat	Lipase inhibitor
7153	35.71	cp	BRD-K49404994	levetiracetam	Calcium channel blocker
7154	35.73	cp	BRD-K76698671	HNHA	HDAC inhibitor
7155	35.75	cp	BRD-A87387433	cefpodoxime	Bacterial cell wall synthesis inhibitor
7156	35.83	cp	BRD-K67352070	TC-2559	Acetylcholine receptor agonist
7157	35.86	cp	BRD-K65814004	diphenyleneiodonium	Nitric oxide synthase inhibitor
7158	36.14	cp	BRD-K04887706	AKT-inhibitor-1-2	AKT inhibitor
7159	36.25	cp	BRD-K33864865	LY-225910	CCK receptor antagonist
7163	36.39	cp	BRD-K70358946	aripiprazole	Serotonin receptor agonist
7166	36.46	cp	BRD-K09471561	levofloxacin	Bacterial DNA gyrase inhibitor
7168	36.46	cp	BRD-A92161634	scopoline	Acetylcholine receptor antagonist
7170	36.67	cp	BRD-K94841585	emodic-acid	Laxative
7171	36.7	cp	BRD-K82147103	lofepramine	Norepinephrine reuptake inhibitor
7176	36.84	cp	BRD-K00673382	famotidine	Histamine receptor antagonist
7178	36.85	cp	BRD-K64341947	CFM-1571	Guanylate cyclase activator
7184	36.87	cp	BRD-K42095107	daidzein	Estrogen receptor agonist
7185	36.92	cp	BRD-K91370081	anisomycin	DNA synthesis inhibitor
7187	37.07	cp	BRD-K76617868	fasudil	Rho associated kinase inhibitor
7188	37.19	cp	BRD-A07875874	cilnidipine	Calcium channel blocker
7190	37.26	cp	BRD-K07303502	arachidonyl-trifluoro-methane	Cytosolic phospholipase inhibitor
7193	37.31	cp	BRD-K67298865	SB-431542	TGF beta receptor inhibitor
7195	37.5	cp	BRD-K41707108	ceramide	Phosphoenolpyruvate carboxylase activator
7199	37.56	cp	BRD-K99291625	SB-203580	p38 MAPK inhibitor
7203	38.07	cp	BRD-A44448661	pentobarbital	Barbiturate antiepileptic
7206	38.28	cp	BRD-K69837166	trap-101	Nociceptin/orphanin FQ (NOP) receptor antagonist
7207	38.29	cp	BRD-A45889380	mepacrine	Cytokine production inhibitor
7208	38.35	cp	BRD-K00337317	NU-7441	DNA dependent protein kinase inhibitor
7209	38.44	cp	BRD-U08759356	EI-346-erlotinib-analog	EGFR inhibitor
7213	38.6	cp	BRD-K48869804	icilin	TRPV agonist
7215	38.94	cp	BRD-K13642330	cosmosiin	Cytochrome P450 inhibitor
7219	38.96	cp	BRD-A68930007	ouabain	ATPase inhibitor
7220	39.49	cp	BRD-K60460488	nelfinavir	HIV protease inhibitor
7223	39.6	cp	BRD-K97752965	nicorandil	Nitric oxide donor
7224	40.02	cp	BRD-K82216340	medroxyprogesterone	progesterone receptor agonist
7227	40.32	cp	BRD-A13188892	doxazosin	Adrenergic receptor antagonist
7235	40.98	cp	BRD-K92301463	16,16-dimethylprostaglandin-e2	Prostanoid receptor agonist
7239	41.02	cp	BRD-A68589262	troxipide	Glucosamine synthetase stimulant
7241	41.3	cp	BRD-K18523449	mestanolone	Androgenic steroid
7243	41.32	cp	BRD-K94441233	mevastatin	HMGCR inhibitor
7247	41.33	cp	BRD-K02227374	milnacipran	Serotonin reuptake inhibitor
7248	41.37	cp	BRD-K66412701	pazufloxacin	Topoisomerase inhibitor
7249	41.82	cp	BRD-K62858456	lomerizine	Calcium channel blocker
7250	42.61	cp	BRD-K74733595	APHA-compound-8	HDAC inhibitor
7251	42.7	cp	BRD-K46435977	valaciclovir	DNA polymerase inhibitor
7253	42.76	cp	BRD-K67868012	PI-103	MTOR inhibitor
7254	42.96	cp	BRD-A72596465	GW-6471	PPAR receptor antagonist
7255	43.05	cp	BRD-K53790871	triamcinolone	Glucocorticoid receptor agonist
7257	43.87	cp	BRD-K59962020	CHEMBL-374350	NFkB pathway inhibitor
7263	43.99	cp	BRD-A94413429	NTNCB	Neuropeptide receptor antagonist
7264	44.01	cp	BRD-K48932581	cetraxate	Mucus protecting agent
7265	44.03	cp	BRD-A87848830	bimatoprost	Prostanoid receptor agonist
7266	44.39	cp	BRD-K96778649	tyrphostin-47	EGFR inhibitor
7268	44.71	cp	BRD-K68392338	ZK-93426	Benzodiazepine receptor antagonist
7269	44.77	cp	BRD-K19796430	erismodegib	Smoothened receptor antagonist
7273	44.88	cp	BRD-A81177136	KN-62	Calcium-calmodulin dependent protein kinase inhibitor
7274	45.03	cp	BRD-K68488863	ENMD-2076	FLT3 inhibitor
7275	45.1	cp	BRD-A55594068	vinblastine	Microtubule inhibitor
7277	45.61	cp	BRD-K50464341	berbamine	Calmodulin antagonist
7279	45.84	cp	BRD-K46137903	prednicarbate	Phospholipase activator
7280	45.9	cp	BRD-K94887716	TFMPP	Serotonin receptor agonist
7285	45.91	cp	BRD-K47869605	podophyllotoxin	Microtubule inhibitor
7288	46.04	cp	BRD-K08206212	entecavir	Reverse transcriptase inhibitor
7290	46.17	cp	BRD-K90789829	nefazodone	Adrenergic inhibitor
7293	46.21	cp	BRD-K98493452	honokiol	AKT inhibitor
7296	46.28	cp	BRD-K16233984	eriochrome-black-t	Azo dye
7297	46.32	cp	BRD-K50168500	canertinib	EGFR inhibitor
7298	46.54	cp	BRD-K87919739	tyrphostin-AG-825	Receptor tyrosine protein kinase inhibitor
7300	46.88	cp	BRD-K88304388	dextrorphan	Glutamate receptor antagonist
7302	47.11	cp	BRD-K11373525	ZD-7155	Angiotensin receptor antagonist
7308	47.37	cp	BRD-K83289131	CAY-10618	NAMPT inhibitor
7309	47.38	cp	BRD-K66206289	lobeline	Acetylcholine receptor antagonist
7310	47.42	cp	BRD-K51967704	BIIB021	HSP inhibitor
7313	47.42	cp	BRD-K29673530	hypericin	Tyrosine kinase inhibitor
7314	47.54	cp	BRD-K22878149	SB-205607	Delta 1 opioid receptor agonist
7319	47.84	cp	BRD-K75641298	metoclopramide	Dopamine receptor antagonist
7320	48.03	cp	BRD-K09991945	GSK-3-inhibitor-II	PKC inhibitor
7321	48.07	cp	BRD-K73293050	WZ-3146	EGFR inhibitor
7323	48.33	cp	BRD-K53913732	SB-408124	Orexin receptor antagonist
7326	48.58	cp	BRD-K11634954	GBR-13069	Dopamine uptake inhibitor
7333	48.64	cp	BRD-A55484088	BNTX	Opioid receptor antagonist
[truncated: 430 more rows]
